# Bayesian Model Selection Maps for group studies using M/EEG data

1 **Clare D. Harris<sup>1†\*</sup>, Elise G. Rowe<sup>2†</sup>, Roshini Randeniya<sup>1\*</sup>, Marta I. Garrido<sup>1,3,4,5</sup>**

2 <sup>1</sup>Computational Cognitive Neuroscience Laboratory, Queensland Brain Institute, The University of  
3 Queensland, Brisbane, Queensland, Australia

4 <sup>2</sup>Tsuchiya Lab, School of Psychology, Faculty of Medicine, Nursing and Health Science, Monash  
5 University, Melbourne, Victoria, Australia

6 <sup>3</sup>School of Mathematics and Physics, The University of Queensland, Brisbane, Queensland, Australia

7 <sup>4</sup>Australian Research Council Centre of Excellence for Integrative Brain Function, Monash  
8 University, Melbourne, Victoria, Australia

9 <sup>5</sup>Centre for Advanced Imaging, The University of Queensland, Brisbane, Queensland, Australia

10 † Equal first authorship

11 \* **Correspondence:**

12 Clare D. Harris

13 [clare.harris@uqconnect.edu.au](mailto:clare.harris@uqconnect.edu.au)

14 **Keywords: EEG, MEG, Bayes, PPMs, BMS, code:matlab, code:spm**

15 **Abstract**

16 Predictive coding postulates that we make (top-down) predictions about the world and that we  
17 continuously compare incoming (bottom-up) sensory information with these predictions, in order to  
18 update our models and perception so as to better reflect reality. That is, our so-called ‘Bayesian brains’  
19 continuously create and update generative models of the world, inferring (hidden) causes from  
20 (sensory) consequences. Neuroimaging datasets enable the detailed investigation of such modelling  
21 and updating processes, and these datasets can themselves be analysed with Bayesian approaches.  
22 These offer methodological advantages over classical statistics. Specifically, any number of models  
23 can be compared, the models need not be nested, and the ‘null model’ can be accepted (rather than only  
24 failing to be rejected as in frequentist inference). This methodological paper explains how to construct  
25 posterior probability maps (PPMs) for Bayesian Model Selection (BMS) at the group level using  
26 electroencephalography (EEG) or magnetoencephalography (MEG) data. The method has only  
27 recently been used for EEG data, after originally being developed and applied in the context of  
28 functional magnetic resonance imaging (fMRI) analysis. Here, we describe how this method can be  
29 adapted for EEG using the Statistical Parametric Mapping (SPM) software package for MATLAB. The  
30 method enables the comparison of an arbitrary number of hypotheses (or explanations for observed  
31 responses), at each and every voxel in the brain (source level) and/or in the scalp-time volume (scalp  
32 level), both within participants and at the group level. The method is illustrated here using mismatch  
33 negativity (MMN) data from a group of participants performing an audio-spatial oddball attention task.  
34 All data and code are provided in keeping with the Open Science movement. In so doing, we hope to  
35 enable others in the field of M/EEG to implement our methods so as to address their own questions of  
36 interest.

## 37 **1 Introduction**

38 The statistical testing of hypotheses originated with Thomas Bayes (Neyman and Pearson, 1933),  
39 whose famous eponymous theorem (Bayes and Price, 1763) can be written in terms of probability  
40 densities as follows:

$$41 \quad p(\theta|y) = \frac{p(y|\theta)p(\theta)}{p(y)} \quad (\text{Eq. 1})$$

42 where  $\theta$  denotes unobserved parameters,  $y$  denotes observed quantities, and  $p(\theta|y)$  denotes the  
43 probability  $p$  of the unknown parameters  $\theta$ , given (“|”) the set of observed quantities  $y$ . More generally,  
44  $p(\text{event}|\text{knowledge})$  denotes the probability of an event given existing knowledge. In other words,  
45 Bayes conceptualises statistics as simply the plausibility of a hypothesis given the knowledge available  
46 (Meinert, 2012).

47 Bayes’ theorem allows one to update one’s knowledge of the previously-estimated (or “prior”)  
48 probability of causes, to a new estimate, the “posterior” probability of possible causes. This process  
49 can be repeated indefinitely, with the prior being recursively updated to the new posterior each time.  
50 This gives rise to multiple intuitive and useful data analysis methods, one of which is the explained in  
51 detail in this paper.

52 Even when it first appeared, Bayes’ theorem was recognised as an expression of “common sense,” a  
53 “foundation for all reasonings concerning past facts,” (Bayes and Price, 1763). Centuries later,  
54 neuroscientific evidence suggests that Bayes theorem may not only explain our “common sense” and  
55 internal reasoning processes, but may be common to all our senses: it can actually explain the way in  
56 which we use our various senses to perceive the world. That is, Bayesian statistics can be used to  
57 accurately model and predict the ways in which our own brains process information (Dayan et al.,  
58 1995; Feldman and Friston 2010; Friston, 2012; Hohwy, 2013). This has given rise to the concepts of  
59 predictive coding and the Bayesian brain. In this context, it is unsurprising that Bayesian approaches  
60 to statistics have high face validity (Friston and Penny, 2003). This allows for intuitive descriptions of  
61 probability and enables experimental results to be relatively easily understood and communicated both  
62 within and between scientific communities, as well as to the general public (Dunson, 2001).

63 Despite the intuitiveness of Bayesian approaches, however, the mainstay of hypothesis-testing since  
64 the twentieth century (Vallverdú, 2008) has instead been classical or frequentist statistics, which  
65 conceptualises probability as a ‘long-run frequency’ of events, and which has dominated most  
66 approaches to neuroimaging analysis to date (Penny et al., 2007). For example, creating statistical  
67 parametric maps (SPMs), which is a popular method of analysing neuroimaging data, mainly involves  
68 frequentist approaches (Friston and Penny, 2003).

69 In frequentist statistics, the null hypothesis (that there is no relationship between the causes and the  
70 data) is compared with one alternative hypothesis; the null is then either rejected in favour of the  
71 alternative hypothesis, or it fails to be rejected – it can never be directly “supported.” Rejection of the  
72 null depends on the somewhat unintuitive p-value, which communicates how likely it is that the effect  
73 (of at least the size seen in the experiment), would be seen in the absence of a true effect, if the  
74 experiment were repeated many times. This is a more complex and counterintuitive way of  
75 communicating results compared to Bayesian statistics (where the probability of the hypothesis in  
76 question is what is being estimated and communicated).

## BMS Maps for group studies with M/EEG data

77 Also, unfortunately, multiple different models cannot be compared at once, and the null and the  
78 alternative models need to be nested for frequentist statistical tests to be feasible (Rosa et al., 2010).  
79 These features cause frequentist statistics to be less useful in certain contexts, compared to the  
80 approaches enabled by Bayesian statistics.

81 In recent decades, Bayesian approaches are becoming increasingly recognised for their superior utility  
82 for addressing certain questions and in specific data analysis situations, as explained below (Beal, 2003;  
83 Rosa, et al., 2010; Penny and Ridgway, 2013). Importantly, with Bayesian approaches to data analysis,  
84 any number of models can be compared, the models need not be nested, and the ‘null model’ can be  
85 accepted (Rosa et al., 2010). The fact that Bayesian hypothesis-testing also allows researchers to  
86 evaluate the likelihood of the null hypothesis is crucially important in light of the replication crisis in  
87 psychology and neuroscience (Hartshorne, 2012; Larson and Carbine, 2017; Szucs et al., 2017).  
88 Importantly, results supporting the null hypothesis are equally noteworthy or reportable as other results  
89 within Bayesian statistics. The use of Bayesian statistics may also ameliorate some statistical power-  
90 related problems documented in the literature (Dienes, 2016).

91 Even though Bayesian statistics has gained popularity in the context of ‘accepting the null’, its strength  
92 lies beyond this, in the sense that it enables the relative quantification of any number of *alternative*  
93 models (or hypotheses). In Bayesian Model Selection (BMS), models are compared based on the  
94 probability of observing a particular dataset given each model’s parameters. The probability of  
95 obtaining observed data,  $y$ , given model  $m$ ,  $p(y|m)$ , is known as the model evidence. In BMS, an  
96 approximation of the model evidence is calculated for multiple models; the model evidences are then  
97 compared to determine which model returns the highest probability of generating the particular dataset  
98 in question (Rosa et al., 2010).

99 A computationally efficient and relatively accurate (Penny et al., 2009) method of approximating the  
100 model evidence is to use variational Bayes (VB). If each participant in the dataset is assumed to have  
101 the same model explaining their data, then this is called a fixed effects (FFX) approach. If, on the other  
102 hand, every participant is permitted to have their own (potentially different) model, this is called a  
103 random effects (RFX) approach.

104 An elegant approach to succinctly communicating results is to use Posterior Probability maps (PPMs),  
105 which provide a visual depiction of the spatial and/or temporal locations in which a particular model  
106 is more probable than the alternatives considered, given the experimental data in question. The  
107 development of PPMs is essentially the Bayesian alternative to the creation of SPMs (Friston and  
108 Penny, 2003). PPMs may display the posterior probability of the models (the probability that a model  
109 explains the data), or, alternatively, they may be displayed as Exceedance Probability Maps (EPMs),  
110 which are maps of the probabilities that a model (say  $k$ ) is *more* likely compared to all other ( $K$ ) models  
111 considered (Rosa et al., 2010). (EPMs will be identical to posterior probability maps in cases where  
112 there are only two models being considered, as in this study.) EPMs are useful in that they allow us to  
113 directly quantify which model is more probable than the other/s considered.

114 The data analysis method that forms the focus of this paper is Posterior Probability Mapping with an  
115 RFX approach to VB. First introduced (Rosa et al., 2010) for functional magnetic resonance imaging  
116 (fMRI), the method has recently been adapted for inference using electroencephalography (EEG) data  
117 (Garrido et al., 2017). In their study, Garrido and colleagues (2017) used variational Bayes to  
118 approximate the log of the model evidence for each voxel (in space and time) in every participant, in  
119 order to construct PPMs at the group level. They did this in the context of comparing between two  
120 computational models describing the relationship between attention and prediction in auditory

121 processing. While that paper focused on using this Bayesian methodology to address an important  
122 neuroscientific question, the precise way in which Rosa and colleagues' (2010) methods were adapted  
123 for use with EEG data have not been formally described to date – leading to the purpose of this paper.

124 Here, we describe in a tutorial-like manner how to build and compare PPMs for EEG and/or  
125 magnetoencephalography (MEG) data (M/EEG), using an RFX approach to VB. This approach  
126 provides useful ways of displaying the probabilities of different models at different times and brain  
127 locations, given any set of neuroimaging data (as done in (Garrido et al., 2017)) using the Statistical  
128 Parametric Mapping (SPM) software package for MATLAB. Furthermore, in keeping with the Open  
129 Science movement, we provide the full EEG dataset (<https://figshare.com/s/1ef6dd4bbdd4059e3891>)  
130 and the code (<https://github.com/ClareDiane/BMS4EEG>) to facilitate future use of the method. In so  
131 doing, we hope that this paper and its associated scripts will enable others in the field of M/EEG to  
132 implement our methods to address their own questions of interest.

## 133 **2 Theory**

134 In frequentist hypothesis testing, what is actually being tested is the null hypothesis (i.e. that there is  
135 no relationship between the variables of interest; Friston, 2007b). If it is assumed that there is a linear  
136 relationship between the causes and data, then the relationship between the causes ( $x$ ) and data ( $y$ ) can  
137 be represented as below (Friston, 2007b):

$$138 \quad \mathbf{y} = \mathbf{x}\boldsymbol{\theta} + \boldsymbol{\varepsilon} \quad (\text{Eq. 2})$$

139 where  $y$  denotes data,  $x$  denotes causes and  $\varepsilon$  is an error term. The null hypothesis is that the relationship  
140 between the causes and data does not exist, that is,  $\boldsymbol{\theta} = 0$ . The null hypothesis is compared to one  
141 alternative hypothesis; the null is then either rejected in favour of the alternative hypothesis, or it fails  
142 to be rejected – it can never be directly “supported.”

143 Using the frequentist framework, one cannot test multiple models at once (unlike what can be done  
144 when using Bayesian approaches). (In this setting, a model corresponds to a particular mixture of  
145 explanatory variables in the design matrix  $x$ .) Even if one only wishes to test one model against the  
146 null, however, frequentist statistics still gives rise to problems unless the null and alternate models are  
147 nested. When the variables in one model cannot be expressed as a linear combination of the variables  
148 in another model, the two models are said to be non-nested (McAleer, 1995). Non-nested models  
149 usually arise when model specifications are subject to differences in their auxiliary assumptions or in  
150 their theoretical approaches, and can still be dealt with by making specific modifications to frequentist  
151 approaches (McAleer, 1995; Horn, 1987). However, there are many situations where Bayesian  
152 approaches are more appropriate for non-nested models than adapted frequentist inference (Rosa et al.,  
153 2010). Indeed, Penny et al. (2007), showed that functional magnetic resonance imaging (fMRI)  
154 haemodynamic basis sets are best compared using Bayesian approaches to non-nested models (Penny  
155 et al., 2007).

156 Furthermore, Bayesian approaches to statistics have long been recognised for their relative advantages  
157 outside of the realm of neuroimaging. In clinical trials, Bayesian experimental design techniques and  
158 interim analyses have been found to improve trials' statistical power, cost-effectiveness and clinical  
159 outcomes (e.g. Trippa et al., 2012; Connor et al., 2013), compared to when classical approaches are  
160 used alone. Bayesian statistics are also especially useful in the worlds of computational physics  
161 (Mohammad-Djafari, 2002) and biology (Needham et al., 2007), and in machine learning (Lappalainen  
162 and Miskin, 2000).

## BMS Maps for group studies with M/EEG data

163 The aim of BMS is to adjudicate between models using each one's *model evidence*. Also written as  
164  $p(y|m)$ , the model evidence is defined as the probability ( $p$ ) of obtaining observed data (denoted  $y$ )  
165 given the model (denoted  $m$ ). It is given by the following integral:

$$166 \quad p(y|m) = \int p(y|\theta, m)p(\theta|m)d\theta \quad (\text{Eq. 3})$$

167 This integral is usually intractable, so numerous methods have been developed to approximate it. As  
168 Blei et al., (2017) succinctly summarise, there are two main ways to solve the problem of  
169 approximating the integral above. One is to sample a Markov chain (Blei et al., 2017), and the other is  
170 to use optimisation. The conversion of an integration problem into an optimisation problem is due to  
171 Richard Feynman, who introduced variational free energy in the setting of path integral problems in  
172 quantum electrodynamics (Feynman et al., 2010; Feynman and Brown, 1942). By inducing a bound on  
173 the integral above – through an approximate posterior density (please see below) – one converts an  
174 intractable integration problem into a relatively straightforward optimisation problem, that can be  
175 solved using gradient descent.

176 Some of the specific approximation methods that have been used to date include Annealed Importance  
177 Sampling (AIS; Neal, 1998; Penny and Sengupta, 2016), Bayesian Information Criterion (BIC)  
178 measures (Rissanen, 1978; Penny, 2012), Akaike Information Criterion (AIC) measures (Akaike, 1980;  
179 Penny, 2012), and finally, the variational Free Energy ( $F$ ), which was first applied to the analysis of  
180 functional neuroimaging time series by Penny, Kiebel and Friston (2003) and which is explained in  
181 this paper (Rosa et al., 2010). These methods have varying degrees of accuracy and computational  
182 complexity, and have been studied in detail elsewhere (Beal and Ghahramani, 2003; Penny et al., 2004;  
183 Penny, 2012). The variational Free Energy provides a relatively high level of accuracy, without a great  
184 computational cost (Rosa et al., 2010), and so it is unsurprising that it is widely used in neuroimaging  
185 (Rosa et al., 2010). The Free Energy formula is (Penny et al., 2003):

$$186 \quad F = \int q(\theta|y) \log \frac{p(y, \theta)}{q(\theta|y)} d\theta \quad (\text{Eq. 4})$$

187 where  $q(\theta|y)$  is an (initially) arbitrary distribution of the parameters  $\theta$  given the data at each voxel  $y$ ,  
188  $p(y, \theta)$  denotes the joint probability of the data and the parameters occurring, and  $d\theta$  simply denotes  
189 that the integral given by  $F$  is with respect to the model parameters  $\theta$ .

190 The “variational” term in variational Free Energy, and in variational Bayes (VB), refers to the branch  
191 of calculus (the calculus of variations) that deals with maximising or minimising functionals, or  
192 integrals. The utility of variational calculus in neuroimaging analysis has been reviewed in numerous  
193 other papers (Friston et al., 2008). In brief, the aim in variational Bayes is to maximise the functional  
194 given by the equation above. The reason for doing this is that it provides information about the model  
195 evidence. More specifically, the Free Energy relates to the log of the model evidence (or log-model  
196 evidence) as described by the following equation, known as the fundamental equation of variational  
197 Bayes (Penny et al., 2003):

$$198 \quad \log p(y|m) = F(m) + KL(q(\theta)||p(\theta|y, m)) \quad (\text{Eq. 5})$$

199 where  $\log p(y|m)$  is the log-model evidence,  $F$  is the variational Free Energy, and  $KL(q(\theta)||p(\theta|y, m))$  is  
200 the Kullback-Leibler divergence, or relative information, with respect to the approximate distribution

201  $q(\theta)$  and the distribution that is diverging from it, namely the true distribution,  $p(\theta|y,m)$ , as further  
202 described below.

203 The reason why Free Energy can be used as an approximation of the model evidence is better  
204 understood in light of the meaning of the second term in the fundamental VB equation, the Kullback-  
205 Leibler (KL) divergence (Penny et al., 2003). The equation for this is:

$$206 \quad KL = \int q(\theta|y) \log \frac{q(\theta|y)}{p(\theta|y)} d\theta \quad (\text{Eq. 6})$$

207 where all terms listed here have the same meanings as defined in earlier paragraphs. The KL divergence  
208 is also known as KL information, and this is because it is a measure of the information “difference” or  
209 divergence between two distributions. It can be derived by considering the so-called cross-entropy and  
210 entropy of the two distributions respectively, as outlined below (Carter, 2011). The concept of “relative  
211 entropy” is essentially “average information,” with “information” being defined as Shannon (1984)  
212 originally introduced:

$$213 \quad I(p) = \log_b \left( \frac{1}{p} \right) = -\log_b(p) \quad (\text{Eq. 7})$$

214 where  $I(p)$  is the information given by observation of an event of probability  $p$ , and  $\log_b(\frac{1}{p})$  is the  
215 logarithm (in base  $b$ ) of the inverse of the probability of that event. The formula above is used to derive  
216 the “average information,” also sometimes referred to a relative entropy, from a set of events. A related  
217 concept is the “cross entropy” between two distributions (see Carter, 2011); and the difference between  
218 the cross entropy and the entropy of the original/true distribution is equivalent to the KL divergence.  
219 Being a measure of information, the KL divergence has the property that it is non-negative;  
220 consequently, the lowest value it can take is zero.

221 The KL divergence between two distributions is zero only if the two distributions are equivalent. The  
222 closer KL is to zero, the less dissimilar the two distributions are. Thus, minimising KL is equivalent to  
223 maximising F, and F is said to provide a lower bound on the log-evidence. The aim of VB learning is  
224 to maximise F so that the approximate posterior thereby becomes as close as possible to the true  
225 posterior (Penny et al., 2007).

226 If (and only if) the KL divergence is zero, then F is equal to the log-model evidence. The free energy  
227 thus provides a *lower bound* on the log-evidence of the model, which is why iteratively optimising it  
228 allows us to proceed with BMS using F as an *approximation* of the log-model evidence (Penny et al.,  
229 2007). As the KL divergence is minimised by an iterative process of optimisation, F becomes an  
230 increasingly “tighter” lower bound on the desired (actual) log-model evidence; owing to this, BMS can  
231 proceed using F as a “surrogate” for the log-model evidence (Rosa et al., 2010). The iterations continue  
232 until improvements in F are very small (below some desired threshold). This method of estimating the  
233 log-model evidence is implemented in the second script described in the Implementation section  
234 (“BMS2\_ModelSpec\_VB.m”).

235 Although it has been summarised here, it is also worth noting that VB is further fleshed out in multiple  
236 other research papers (Penny et al., 2003; Friston et al., 2007; Friston and Penny, 2007; Penny et al.,  
237 2007) and tutorials (Lappalainen and Miskin, 2000). In *Statistical Parametric Mapping*, Friston  
238 (2007a) provides the mathematical derivations for the fundamental equation of variational Bayes, and  
239 his colleagues provide a full explanation of its application to BMS (Penny et al., 2007).

## BMS Maps for group studies with M/EEG data

240 The application of VB in the context of fMRI analysis has been described in detail elsewhere (Rosa et  
241 al., 2010; Stephan et al., 2009; Penny et al., 2007). Penny and colleagues (2007) used Bayesian  
242 spatiotemporal models of within-subject log-model evidence maps for fMRI data, in order to make  
243 voxel-wise comparison of these maps and thereby to make inferences about regionally specific  
244 effects. Rosa and colleagues (2010) developed their approach by combining the methods described by  
245 Penny et al. (2007) with those of Stephan et al. (2009), who used an RFX approach to VB, as described  
246 below.

247 After the log-model evidence has been estimated as described above, given uniform priors over models,  
248 one can then estimate posterior model probabilities by comparing model-evidences between models.  
249 The ratio between model evidences, or Bayes factor (BF), can be used to estimate posterior model  
250 probabilities. A BF greater than 20 is equivalent to a posterior model probability greater than 0.95  
251 (Kass and Raftery, 1995), which is reminiscent of the typical  $p$ -value smaller than 0.05. The product  
252 of Bayes factors over all subjects is called the Group Bayes Factor (GBF), and it gives the relative  
253 probability that one model (relative to another) applies to the entire group of subjects. That is, it rests  
254 on the assumption that the data were generated by the same model for all participants, and that data are  
255 conditionally independent over subjects. This is known as fixed effects (FFX) inference, and it is not  
256 as robust to outliers as random effects (RFX) inference, which does not assume that the data were  
257 necessarily generated by the same model for each participant (Stephan et al., 2009).

258 Stephan et al. (2009) developed a novel VB approach for group level methods of Bayesian model  
259 comparison that used random effects instead of fixed effects analysis at the group level. They did this  
260 by treating models as random variables whose probabilities can be described by a Dirichlet distribution  
261 (which is conjugate to the multinomial distribution) with parameters that are estimated using the log-  
262 model evidences over all models and subjects (as described below). Once the optimal Dirichlet  
263 parameters have been estimated, they can be used to calculate posterior probabilities or exceedance  
264 probabilities of a given model for a randomly-selected participant. This is what is done in the third  
265 script (“BMS3\_PPMs.m”, described in the Implementation section below), and the underlying  
266 mathematics is explained briefly below.

267 In the RFX approach introduced by Stephan et al. (2009), we assume that the probabilities of the  
268 different models (or hypotheses) are described by the following Dirichlet distribution:

$$269 \quad p(r|\alpha) = Dir(r, \alpha) = \frac{1}{Z(\alpha)} \prod_k r_k^{\alpha_k - 1} \quad (Eq. 8)$$
$$270 \quad Z(\alpha) = \frac{\prod_k \Gamma(\alpha_k)}{\Gamma(\sum_k \alpha_k)}$$

271 where  $r$  represents the probabilities  $r = [r_1, \dots, r_K]$  of  $K$  different models (or hypotheses), and  $\alpha = [\alpha_1$   
272  $, \dots, \alpha_K]$  are related to unobserved “occurrences” of models in the population. This distribution is part  
273 of a hierarchical model: the next level depends on model probabilities,  $r$ , which are described by the  
274 Dirichlet distribution.

275 In the next level of the hierarchical model, we assume that the probability that a particular model  
276 generated the data of a particular subject, is given by a multinomial variable  $m_n$  whose probability  
277 distribution is as follows:

278 
$$p(m_n|r) = \prod_k r^{m_{nk}} \quad (\text{Eq. 9})$$

279 where  $m_n$  is the multinomial variable that describes the probability that model  $k$  generated the data of  
280 subject  $n$  given the probabilities  $r$ .

281 Finally, in the lowest level of this hierarchical model, the probability of the data in the  $n$ th subject,  
282 given model  $k$ , over all parameters ( $\vartheta$ ) of the selected model (i.e. the marginal likelihood of the data in  
283 the  $n$ th subject, obtained by integrating over the parameters of the model) is given by:

284 
$$p(y_n|m_{nk}) = \int p(y|\vartheta)p(\vartheta|m_{nk})d\vartheta \quad (\text{Eq. 10})$$

285 The goal is to invert this hierarchical model, that is, work backwards from data ( $y_n$ ) find the parameters  
286 of the Dirichlet distribution (which then allows the calculation of the expected posterior probability of  
287 obtaining the  $k$ th model for any randomly selected subject, as shown below). This model inversion is  
288 done using a VB approach in which the Dirichlet distribution is approximated with a conditional  
289 density,  $q(r) = \text{Dir}(r, \alpha)$ . Stephan et al. (2009) show that the following algorithm yields the optimal  
290 parameters of the conditional density  $q(r) = \text{Dir}(r, \alpha)$ :

291 
$$\alpha = \alpha_0$$

292 Until convergence

293 
$$u_{nk} = \exp\left(\ln p(y_n|m_{nk}) + \Psi(\alpha_k) - \Psi\left(\sum_k \alpha_k\right)\right) \quad (\text{Eq. 11})$$

294 
$$\beta_k = \sum_n \frac{u_{nk}}{\sum_k u_{nk}}$$

295 
$$\alpha = \alpha_0 + \beta$$

296 end

297 where  $\alpha$  are “occurrences” of models in the population;  $\alpha_0$  is the Dirichlet prior, which, on the  
298 assumption that no models have been “seen” *a priori*, is set as  $\alpha_0 = [1, \dots, 1]$  so that all models are  
299 equally probable to begin with;  $u_{nk}$  is the non-normalised belief that model  $k$  generated the data  $y_n$  for  
300 subject  $n$  (for the derivation of this line, please see Stephan et al., 2009);  $\Psi$  is the digamma function  
301  $\Psi(\alpha_k) = \frac{\delta \log \Gamma(\alpha_k)}{\delta \alpha_k}$ ;  $\beta_k$  is the expected number of subjects whose data are believed to be generated by  
302 model  $k$  (so-called “data counts”); and the last line,  $\alpha = \alpha_0 + \beta$  essentially obtains the parameters of  
303 the Dirichlet distribution by starting with the Dirichlet prior  $\alpha_0$  and adding on “data counts”  $\beta$  (Stephan  
304 et al., 2009).

305 Once the Dirichlet parameters have been optimised as per the algorithm above, this can be used for  
306 model comparisons at the group level. One way of comparing models is to simply compare the  
307 parameter estimates  $\alpha$ . Another way is to calculate the multinomial parameters,  $\langle r_k \rangle$ , that encode the  
308 posterior probability of model  $k$  being selected for a randomly chosen subject in the group:



## BMS Maps for group studies with M/EEG data

309 
$$\langle r_k \rangle = \alpha_k / (\alpha_1 + \dots + \alpha_K) \quad (\text{Eq. 12})$$

310 where  $r_k$  is the probability of the model; the numerator of the fraction,  $\alpha_k$ , is the “occurrence” of model  
311  $k$ ; and the denominator ( $\alpha_1 + \dots + \alpha_K$ ) is the sum of all model “occurrences.” This was how the PPMs  
312 were generated in the third script (“BMS3\_PPMs.m”) below.

313 Another option for comparing models after the optimal Dirichlet parameters have been found, is to  
314 calculate the exceedance probability for a given model, as follows:

315 
$$\varphi_k = p \left( \prod_{j \neq k} r_k > r_j | y; \alpha \right) \quad (\text{Eq. 13})$$

316 where  $\varphi_k$  is the exceedance probability for model  $k$ , that is, the probability that it is more likely than  
317 any of the other models considered;  $r_k$  is the probability of model  $k$ ;  $r_j$  is the probability of all other  
318 models considered;  $y$  represents the data and  $\alpha$  represents the Dirichlet parameters.

319 Having introduced this RFX approach to VB, Stephan and colleagues (2009) then used both simulated  
320 and empirical data to demonstrate that when groups are heterogeneous, fixed effects analyses fail to  
321 remain sufficiently robust. Crucially, they also showed that RFX is robust to outliers, which can  
322 confound inference under FFX assumptions, when those assumptions are violated. Stephan et al. thus  
323 concluded that although RFX is more conservative than FFX, it is still the best method for selecting  
324 among competing neurocomputational models.

325 **3 Methods**

326 **3.1 Experimental design**

327 This experiment is a direct replication of that performed by Garrido et al. (2017), apart from the  
328 omission of a ‘divided attention’ condition. As they describe in greater detail in their paper, Garrido et  
329 al. (2017) utilised a novel audio-spatial attention task during which attention and prediction were  
330 orthogonally manipulated; this was done to evaluate the effect of surprise and attention in auditory  
331 processing (Garrido et al., 2017). The authors compared two models (shown in Figure 1) which may  
332 explain the effect attention has on the neural responses elicited by predicted and unpredicted events.

333 [Figure 1 about here]

334 The original study supported the model in which attention boosts neural responses to both predicted  
335 and unpredicted stimuli, called the Opposition Model (Garrido et al., 2017). Prediction attenuates  
336 neural activity, while attention enhances this activity. Since these effects occur in opposite directions  
337 or have opposing effects, the researchers named the model (describing these effects) the Opposition  
338 Model. According to this model, attention improves the accuracy of predictions by precision weighting  
339 prediction errors more heavily. Thus, in light of this model, attention and prediction work together (in  
340 opposite directions) to improve our ability to make more accurate representations of the sensorium.

341 Our current study attempted to replicate the above-mentioned study with an independent dataset and  
342 employing the Bayesian methods that resembled the original study as closely as possible. The only  
343 difference was that the divided-attention condition was not administered because it was not required  
344 for the implementation and description of the BMS steps. It is hoped that the detailed description of  
345 our methods, adapted from those originally developed for fMRI by Rosa et al. (2010), prove to be  
346 useful for other EEG and/or MEG researchers. Furthermore, a replication study such as this one has  
347 the additional benefit of being responsive to the persisting replication crisis that continues to pose a  
348 significant problem for neuroscience and psychology (Hartshorne, 2012; Larson and Carbine, 2017;  
349 Szucs et al., 2017).

350 To this end we employed BMS to adjudicate between two competing hypotheses (see Figure 1),  
351 namely:

352 (1) Attention increases (boosts) neural responses to both predicted and unpredicted stimuli. This is  
353 formalised in the Methods section and is then called Model One – the Opposition Model.

354 (2) Attention boosts neural responses to predicted stimuli more than it boosts responses to unpredicted  
355 stimuli. This causes predicted attended stimuli to generate the highest neural responses, followed by  
356 attended unpredicted stimuli. This is formalised in the Methods section and is then called Model Two  
357 – the Interaction Model.

## BMS Maps for group studies with M/EEG data

### 3.2 Participants

359 Twenty-one healthy adults (aged between 19-64 years,  $M = 25.00$  years,  $SD = 9.83$ , nine females) were  
360 recruited via the University of Queensland's Psychology Research Participation Scheme (SONA).  
361 Exclusion criteria included any history of mental or neurological disease, any previous head injury  
362 resulting in unconsciousness, or an age outside the prescribed range (18-65 years). All participants  
363 gave both written and verbal informed consent to both the study and to having their de-identified data  
364 made available in publicly distributed databases. Participants completed practice blocks of stimulus  
365 presentation prior to undergoing the EEG recording, in order to enable them to withdraw if they found  
366 the task unpleasant or excessively challenging. (No participants wished to withdraw.) Participants were  
367 monetarily compensated for their time. This study was approved by the University of Queensland  
368 Human Research Ethics Committee.

### 3.3 Task description

370 Participants wore earphones with inner-ear buds (Etymotic, ER3) and were asked to follow instructions  
371 on a computer screen. Participants were asked to pay attention to the sound stream in either the left or  
372 the right ear (ignoring the sounds that were being played in the other ear). Gaussian white noise was  
373 played to both ears and an oddball sequence was played to one of the ears. During a given block,  
374 participants were tasked with listening carefully for gaps in the white noise on the side to which they  
375 had been asked to attend. They were asked to press a "1" on the numbered keyboard when they heard  
376 a single gap (lasting 90 ms) in the white noise, and a "2" when they heard a double gap (two 90 ms  
377 gaps separated by 30 ms of white noise). They were asked to ignore any tones played on both the  
378 attended and the opposite ear. This task is described in further detail, including pictorial  
379 representations, in Garrido et al., (2017).

380  
381 Participants listened to eight different blocks, each 190 seconds in duration. Each block contained a  
382 total of 30 targets (15 single gaps and 15 double gaps, randomly distributed across the block, but never  
383 occurring within 2.5 seconds of each other and never occurring at the same time as a tone). Throughout  
384 each block there were also 50-ms-long pure tones being played in one of the ears, with a 450 ms inter-  
385 stimulus interval. In each block there were two tones: the standard tone (either 500 Hz or 550 Hz  
386 counterbalanced between blocks) that occurred 85% of the time, and the deviant (either 550 Hz or 500  
387 Hz, the opposite of the standard tone and counterbalanced across blocks) that occurred 15% of the  
388 time. All sound files were created using MATLAB (RRID:SCR\_001622; The MathWorks, Inc.;  
389 <http://www.mathworks.com>) with sound recordings done using Audacity ® (Audacity: Free Audio  
390 Editor and Recorder, RRID:SCR\_007198) as previously described by Garrido et al., (2017). The order  
391 was counterbalanced such that no two participants received the same order of blocks.

392  
393 Prior to and during the practice block/s, the volume of sound delivery was adjusted until the participant  
394 stated that they were able to hear the white noise well enough to complete the task. For each participant,  
395 an accuracy level was calculated, consisting of the percentage of white noise gaps that were correctly  
396 identified (as single or double) and responded to promptly (i.e. within two seconds of the gap/s). This  
397 was calculated separately for the practice block, which was repeated if a participant did not achieve at  
398 least 50% accuracy. Once participants achieved above 50% accuracy, they were invited to participate  
399 in the rest of the experiment. At the end of the experiment each participant's accuracy was again  
400 calculated to ensure their accuracy level remained at least 50% (otherwise they were excluded from  
401 the study). This was to ensure that participants were attending to the task as instructed.  
402

### 403 **3.4 EEG data acquisition**

404 Using a standardised nylon head cap fitted tightly and comfortably over the scalp, 64 silver/silver  
405 chloride (Ag/AgCl) scalp electrodes were placed according to the international 10-10 system for  
406 electrode placement. As is usual for this system, electrodes were placed above and below the left eye  
407 and just lateral to the outer canthi of both left and right eyes, to generate the vertical electrooculogram  
408 (VEOG) and horizontal electrooculogram (HEOG) recordings respectively. Continuous EEG data were  
409 recorded using a Biosemi Active Two system at a sampling rate of 1024 Hz. The onset of targets,  
410 standards and deviants were recorded with unique trigger codes at the time of delivery to the  
411 participant. Within each block, the target triggers were used for accuracy calculations, while the  
412 standard and deviant triggers were kept as the time points around which to epoch the data at a later  
413 stage.

### 414 **3.5 EEG preprocessing**

415 Following the collection of the raw EEG data, preprocessing was completed using Statistical  
416 Parametric Mapping (SPM) software (SPM12, RRID:SCR\_007037; Wellcome Trust Centre for  
417 Neuroimaging, London; <http://www.fil.ion.ucl.ac.uk/spm/>). EEG data preprocessing included  
418 referencing data to the common average of all electrodes; downsampling to 200 Hz; bandpass filtering  
419 (between 0.5 to 40 Hz); eyeblink correction to remove trials marked with eyeblink artefacts (measured  
420 with the VEOG and HEOG channels); epoching using a peri-stimulus window of -100 to 400 ms;  
421 artefact rejection (with 100 uV cut-off); low-pass filtering (40 Hz; to remove any high frequency noise  
422 from the robust averaging step) and baseline correction (-100 to 0 ms window).

#### 423 *Source Reconstruction*

424 For source BMS, SPM12 software was used to obtain source estimates on the cortex by reconstructing  
425 the scalp activity using a single-shell head model. The forward model was then inverted with multiple  
426 sparse priors (MSP) assumptions for the variance components (Friston et al., 2008) under group  
427 constraints (Litvak and Friston, 2008). The entire time window of 0 to 400 ms was used to infer the  
428 most likely cortical regions that generated the data observed during this time. Images for each  
429 participant and each condition were obtained from the source reconstructions and were smoothed at  
430 full width at half maximum (FWHM) 12 x 12 x 12 mm. This source reconstruction step is available as  
431 an online script (named “BMS1\_Source\_ImCreate.m” and available at  
432 <https://github.com/ClareDiane/BMS4EEG>).

### 433 **3.6 Bayesian Model Selection Maps: Implementation for M/EEG**

434 For all data analysis steps (Table 1), we used SPM12 software package for MATLAB. We wrote in-  
435 house MATLAB scripts, integrated with SPM12 and now available online  
436 (<https://github.com/ClareDiane/BMS4EEG>). The online scripts are divided into three BMS scripts. In  
437 the first script (BMS1\_ST\_ImCreate.m for spatiotemporal BMS and BMS1\_Source\_ImCreate.m for  
438 source BMS), we call the preprocessed EEG data and then create images for every trial, for every  
439 condition, and for every participant. The second script (BMS2\_ModelSpec\_VB.m) specifies the  
440 hypotheses and implements variational Bayes (as described in the Theory section). The last script  
441 (BMS3\_PPMs.m) then creates Posterior Probability Maps.

442 In the model specification and VB script (BMS2\_ModelSpec\_VB.m), we changed individual  
443 participants’ data file structures in order to match the format that SPM typically requires to read fMRI  
444 data. This is done by first loading the relevant file path and then changing the file structure. Once these

## BMS Maps for group studies with M/EEG data

445 newly-structured files had been saved, we next specified the models to be compared: this was done by  
446 assigning covariate weights to describe both models (please see the instructions contained within  
447 BMS2\_ModelSpec\_VB.m on Github). The Opposition Model was assigned weights of [1, 2, 2, and 3]  
448 for the unattended predicted, attended predicted and unattended unpredicted, and attended unpredicted,  
449 respectively. The Interaction Model was assigned weights of [1, 4, 2, and 3] for the same conditions.

450 These covariate weights essentially describe the assumed relationship between the different conditions  
451 according to a given model. For example, using [1, 2, 2, and 3] as employed in the Opposition Model,  
452 means that according to the Opposition Model, the unattended predicted condition (the first condition  
453 with an assigned weight of 1) evokes the smallest activity, whereas the attended unpredicted (the fourth  
454 condition with a weight of 3) has the greater activity, and both attended predicted and unattended  
455 unpredicted (second and third conditions with an equal weight of 2) are in between the former two  
456 conditions and indistinguishable in magnitude from each other.

457 We then created log-evidence images, representing the log-model evidences, for both models  
458 (separately), for every participant (individually) at every voxel. In the case of spatiotemporal (scalp-  
459 level) BMS, each voxel was representative of a specific spatiotemporal location within the peristimulus  
460 time window (0 to 400 ms) and topologically across the scalp, such that the first two dimensions of the  
461 voxel refer to the space across the scalp and the third dimension is time (as shown in Figure 2).  
462 Conversely, in the source BMS (which began with the source reconstruction steps described above),  
463 each voxel was representative of an inferred location in three-dimensional source space. Once log  
464 evidence images had been created, these were smoothed with a 1 mm half-width Gaussian kernel.

465 In summary, one can create posterior probability maps or log evidence maps in sensor or source space.  
466 In sensor space, this involves creating a two-dimensional image over the scalp surface and equipping  
467 the space with a peristimulus time dimension. This creates posterior probability maps over the scalp  
468 surface and peristimulus time, enabling one to identify regionally and temporally specific effects due  
469 to a particular model, relative to other contrasts. Alternatively, one can create three-dimensional  
470 posterior probability maps in source space, following source reconstruction.

471 The core SPM script that allows VB to be used on fMRI data is named `spm_spm_vb.m` and is found  
472 in the SPM12 package, downloadable from the SPM site. This core script was edited in order to adapt  
473 the VB method for EEG, as follows. Changes were made such that different data structures could be  
474 read in the same way that fMRI data would usually be read. Furthermore, high-pass filtering steps were  
475 removed as these only apply to low-frequency drifts associated with fMRI data. The specific changes  
476 made between the original script and the altered one to be used for spatiotemporal BMS are accessible  
477 online ([goo.gl/ZVhPT7](http://goo.gl/ZVhPT7)). For the source BMS steps, the same changes were left in place as outlined  
478 above, and in addition, the required minimum cluster size was changed from 16 voxels to 0 voxels to  
479 allow for visualisation of all clusters of any size. The specific differences between the original and  
480 source BMS versions of the `spm_spm_vb` script are accessible online ([goo.gl/WXAo67](http://goo.gl/WXAo67)).

481 In the final step (`BMS3_PPMs.m`), the SPM Batch Editor was used to apply a random effects approach  
482 to the group model evidence data in a voxel-wise manner, thus translating the log-evidence images  
483 from the previous step into Posterior Probability Maps (similar to how Penny et al. (2007) and Rosa et  
484 al., (2010) have produced PPMs previously for fMRI data). The maps, displayed in the Figures 2, 3  
485 and 4, were generated by selecting threshold probabilities of 75% for the spatiotemporal maps (Figure  
486 2) and 50% for the source maps (Figures 3 and 4). This threshold can be adjusted by the user. EPMs  
487 can also be displayed by selecting the relevant setting in the final script (please see the instructions on  
488 Github).

489 [Table 1 about here]

490

## 491 **4 Results**

492 The raw dataset for this study can be found on Figshare (EEG\_Auditory\_Oddball\_Raw\_Data  
493 repository, <https://figshare.com/s/1ef6dd4bbdd4059e3891>).

494 The preprocessed dataset for this study can also be found on Figshare  
495 (EEG\_Auditory\_Oddball\_Preprocessed\_Data repository,  
496 <https://figshare.com/s/c6e1f9120763c43e6031>).

### 497 **4.1 Scalp - Spatiotemporal**

498 Figure 2 shows scalp (spatiotemporal) PPMs of the two competing models over space and time. These  
499 maps display all posterior probabilities exceeding 75% over space and time for both models. As can  
500 be seen in the figure, spatiotemporal BMS results revealed that Model One (the Opposition Model)  
501 was by and large the superior model. The Opposition Model had model probabilities exceeding 75%  
502 across the majority of later time points (with most significant clusters between 225-360 ms), and over  
503 most frontocentral and bilateral channel locations, as shown in **(A)**. On the other hand, as shown in  
504 **(B)**, the Interaction Model did have over 75% model probability centrally between 175-185 ms, which  
505 is within the mismatch negativity (MMN) time window. These findings replicate those of Garrido et  
506 al., (2017), and strongly support the implications discussed in great depth in that paper.

507 [Figure 2 about here]

### 508 **4.2 Source**

509 As shown in Figures 3, 4 and 5, source BMS results also favoured the Opposition Model, with higher  
510 model probability over the left supramarginal gyrus (with 91% model probability over a relatively large  
511 cluster,  $K_E = 6115$ ), the right superior temporal gyrus (with 87% model probability over a cluster with  
512  $K_E = 5749$ ) as well as over parts of the left inferior parietal lobe, right inferior parietal lobe and left  
513 postcentral gyrus. Having said this, the Interaction Model also had two large clusters, albeit with lower  
514 model probabilities compared to the Opposition Model's highest-probability clusters: specifically, the  
515 Interaction Model had a cluster of size  $K_E = 6346$  over the left inferior parietal lobe and a cluster of  
516 size  $K_E = 5353$  over the right inferior parietal lobe (with 74% model probability in both places).

517 [Figure 3 about here]

518 [Figure 4 about here]

519 [Figure 5 about here]

520 Figures 3 and 4 show that different brain regions are likely to perform different computations best  
521 described by the Opposition and Interaction Models, respectively. Furthermore, Figure 5 compares the  
522 magnitude of the calculated posterior probabilities, at the locations of the highest probability cluster  
523 for both models. The possible functional reasons for the different anatomical locations that emerge for  
524 the two different models may be an interesting subject for future study, but fall outside the scope of  
525 this methods paper. In any case, the usefulness of this probability mapping approach illustrated in  
526 Figures 2, 3 and 4, lies in the ability of pinpointing where and when given computations are likely to  
527 be performed in the brain.

## BMS Maps for group studies with M/EEG data

### 528 **5 Discussion**

529 This paper shows how to use RFX Bayesian model selection mapping methods for M/EEG data  
530 analysis. This method was originally developed for fMRI by Rosa and colleagues (2010), and provides  
531 a way of displaying the probabilities of different cognitive models at different timepoints and brain  
532 locations, given a neuroimaging dataset. We aimed to provide an in-depth explanation, written in a  
533 didactical manner, of the BMS and posterior probability mapping steps that were successfully used by  
534 Garrido et al. (2017) in their recent EEG paper.

535 Being a Bayesian approach to hypothesis-testing, the method described here provides multiple  
536 advantages over frequentist inference methods. The first of these advantages is that VB allows for  
537 comparisons between non-nested models. Consequently, it is especially useful in the context of model-  
538 based neuroimaging (Montague et al., 2004; O'Doherty et al., 2007; Rosa et al., 2010; Garrido et al.,  
539 2017). Another advantage is that the probability of the null hypothesis itself can be assessed (instead  
540 of simply being, or failing to be, rejected). A final advantage is that, although only two models were  
541 compared here, the same method can also be applied to any arbitrary number of models. For example,  
542 the analyses described here could proceed slightly differently, based on the same data but introducing  
543 another (or multiple other) model/s against which to compare the Opposition and Interaction Models.  
544 Potentially, any number of theoretically motivated models could be considered. Considering all of  
545 these advantages, the method described here should prove useful in a wide variety of M/EEG  
546 experiments.

547 In summary, we have shown here how to adapt Bayesian Model Selection maps, originally developed  
548 for fMRI data by Rosa and colleagues (2010), to M/EEG data analysis. It is hoped that the reporting of  
549 analytical methods such as these, as well as the availability of all the code and dataset, will not only  
550 contribute to the Open Science movement, but may also encourage other researchers to adopt this novel  
551 M/EEG data analysis method in a way that is useful for addressing their own neuroscience questions.  
552 We postulate that the use of this Bayesian model mapping of M/EEG data to adjudicate between  
553 competing computational models in the brain, both at the scalp and source level, will be a significant  
554 advancement in the field of M/EEG neuroimaging and may provide new insights in cognitive  
555 neuroscience.

556 **6 Conflict of Interest**

557 The authors declare that the research was conducted in the absence of any commercial or financial  
558 relationships that could be construed as a potential conflict of interest.

559 **7 Author Contributions**

560 MG designed the study and the analysis methods. ER wrote the code. CH and RR collected and  
561 analysed the data, and organised the data and code for sharing. CH wrote the first draft of the  
562 manuscript. ER, RR and MG edited the manuscript.

563 **8 Funding**

564 This work was funded by the Australian Research Council Centre of Excellence for Integrative Brain  
565 Function (ARC Centre Grant CE140100007) and a University of Queensland Fellowship  
566 (2016000071) to MG. RR and CH were both supported by Research Training Program scholarships  
567 awarded by The University of Queensland.

568 **9 Acknowledgments**

569 The authors thank the participants for their time. The authors are grateful to Maria Rosa for helpful  
570 advice regarding source BMS steps, and to the two anonymous reviewers, whose helpful comments  
571 and suggestions led to significant improvements in the paper. The authors also thank Jessica McFadyen  
572 for help with preprocessing, Ilvana Dzafic for help with EEG data acquisition, and Jeremy Taylor for  
573 sharing tools for visualising spatiotemporal images (shown in panels **(B)** and **(D)** in Figure 2).

574



## BMS Maps for group studies with M/EEG data

### 575 10 References

- 576 Adams, R. A., Friston, K. J., & Bastos, A. M. (2015). Active inference, predictive coding and cortical  
577 architecture. In *Recent Advances on the Modular Organization of the Cortex* (pp. 97-121). Springer  
578 Netherlands.
- 579 Akaike, H. (1980). Likelihood and the Bayes procedure. *Trabajos de estadística y de investigación*  
580 *operativa*, 31(1), 143-166.  
581
- 582 Anllo-Vento, L. (1995). Shifting attention in visual space: the effects of peripheral cueing on brain  
583 cortical potentials. *The International journal of neuroscience* 80(1-4): 353-370.
- 584 Arnott, R. S. and R. C. Alain (2002). Stepping out of the spotlight: MMN attenuation as a function of  
585 distance from the attended location. *NeuroReport* 13(17): 2209-2212.
- 586 Auzztulewicz, R. and K. Friston (2015). Attentional Enhancement of Auditory Mismatch Responses:  
587 a DCM/MEG Study. *Cerebral Cortex* 25(11): 4273-4283.
- 588 Bayes, T & Price, R. (1763). An essay towards solving a problem in the doctrine of chances. by the late  
589 Rev. Mr. Bayes, frs communicated by Mr. Price, in a letter to John Canton, amfrs. *Philosophical*  
590 *Transactions* (1683-1775), 370-418.
- 591 Beal, M., Ghahramani, Z., 2003. The variational Bayesian EM algorithms for incomplete data: with  
592 application to scoring graphical model structures. In: Bernardo, J., Bayarri, M., Berger, J., Dawid, A.  
593 (Eds.), *Bayesian Statistics 7*. Cambridge University Press.
- 594 Boly, M., M. Garrido, O. Gosseries, M.-A. Bruno, P. Boveroux, C. Schnakers, M. Massimini, V. Litvak,  
595 S. Laureys and K. Friston (2011). Preserved Feedforward But Impaired Top-Down Processes in the  
596 Vegetative State. *Science* (Washington) 332(6031): 858-862.
- 597 Carter, T., & Fe, S. (2007). *An introduction to information theory and entropy*. Complex systems  
598 summer school, Santa Fe.
- 599 Chaumon, M., V. Drouet and C. Tallon-Baudry (2008). Unconscious associative memory affects visual  
600 processing before 100 ms. *Journal of Vision* 8(3): 10.1-10.
- 601 Chun, M. M. and Y. Jiang (1998). Contextual Cueing: Implicit Learning and Memory of Visual Context  
602 Guides Spatial Attention. *Cognitive Psychology* 36(1): 28-71.
- 603 Connor, J. T., Elm, J. J., Broglio, K. R., & ESETT and ADAPT-IT Investigators. (2013). Bayesian  
604 adaptive trials offer advantages in comparative effectiveness trials: an example in status  
605 epilepticus. *Journal of clinical epidemiology*, 66(8), S130-S137.
- 606 Dayan, P., Hinton, G. E., Neal, R. M., & Zemel, R. S. (1995). The helmholtz machine. *Neural*  
607 *computation*, 7(5), 889-904.
- 608 Dienes, Z. (2016). How Bayes factors change scientific practice. *Journal of Mathematical Psychology*  
609 72: 78-89.
- 610 Doherty, J., A. Rao, M. Mesulam and A. Nobre (2005). Synergistic Effect of Combined Temporal and  
611 Spatial Expectations on Visual Attention. *Journal of Neuroscience* 25(36): 8259-8266.
- 612 Dunson, D. B. (2001). Commentary: practical advantages of Bayesian analysis of epidemiologic  
613 data. *American journal of Epidemiology*, 153(12), 1222-1226.
- 614 Feldman, H., & Friston, K. (2010). Attention, uncertainty, and free-energy. *Frontiers in human*  
615 *neuroscience*, 4, 215-238.

- 616 Feynman, R. P., & Brown, L. M. (1942). *Feynman's thesis: a new approach to quantum theory*. World  
617 Scientific.
- 618 Feynman, R. P., Hibbs, A. R., & Styer, D. F. (2010). *Quantum mechanics and path integrals*. Courier  
619 Corporation.
- 620 Friston K, Penny W (2003) Posterior probability maps and SPMs. *NeuroImage* 19: 1240–1249.
- 621 Friston, K. (2007a). APPENDIX 1 - Linear models and inference. *Statistical Parametric Mapping*.  
622 London, Academic Press: 589-591.
- 623 Friston, K. (2007b). CHAPTER 1 - A short history of SPM. *Statistical Parametric Mapping*. London,  
624 Academic Press: 3-9.
- 625 Friston, K. (2012). The history of the future of the Bayesian brain. *NeuroImage* 62(2): 1230-1233.
- 626 Friston, K., Harrison, L., Daunizeau, J., Kiebel, S., Phillips, C., Trujillo-Barreto, N., Henson, R.,  
627 Flandin, G., Mattout, J., 2008. Multiple sparse priors for the M/EEG inverse problem. *NeuroImage*,  
628 39(3), 1104-1120.
- 629 Friston, K. and W. Penny (2007). CHAPTER 22 - Empirical Bayes and hierarchical models. *Statistical*  
630 *Parametric Mapping*. London, Academic Press: 275-294.
- 631 Friston, K. and W. Penny (2007). CHAPTER 23 - Posterior probability maps. *Statistical Parametric*  
632 *Mapping*. London, Academic Press: 295-302.
- 633 Friston, K. J., N. Trujillo-Barreto and J. Daunizeau (2008). DEM: A variational treatment of dynamic  
634 systems. *Neuroimage* 41(3): 849-885.
- 635 Friston, K., S. Kiebel, M. Garrido and O. David (2007). CHAPTER 42 - Dynamic causal models for  
636 EEG. *Statistical Parametric Mapping*. London, Academic Press: 561-576.
- 637 Garrido, M. I., C. L. J. Teng, J. A. Taylor, E. G. Rowe and J. B. Mattingley (2016). Surprise responses  
638 in the human brain demonstrate statistical learning under high concurrent cognitive demand. *npj*  
639 *Science of Learning* 16006: 1-7.
- 640 Garrido, M. I., M. Sahani and R. J. Dolan (2013). Outlier Responses Reflect Sensitivity to Statistical  
641 Structure in the Human Brain (Statistical Learning and Outlier Detection). 9(3): e1002999: 1-10.
- 642 Garrido, M., Rowe, E., Halasz, V., & Mattingley, J. (2017). Bayesian mapping reveals that attention  
643 boosts neural responses to predicted and unpredicted stimuli. *Cerebral Cortex*, 1-12.
- 644 Hartshorne, J. (2012). Tracking replicability as a method of post-publication open evaluation.  
645 *Frontiers in Computational Neuroscience* 6(NA): 70-83.
- 646 Hohwy, J. (2013). *The predictive mind*. Oxford University Press.
- 647 Kane, N. M., S. H. Curry, S. R. Butler and B. H. Cummins (1993). Electrophysiological indicator of  
648 awakening from coma. 341: 688-688.
- 649 Kass, R. E., & Raftery, A. E. (1995). Bayes factors. *Journal of the american statistical association*,  
650 90(430), 773-795.
- 651 Kok, P., D. Rahnev, J. F. M. Jehee, H. C. Lau and F. P. de Lange (2012). Attention Reverses the Effect  
652 of Prediction in Silencing Sensory Signals. *Cerebral Cortex* 22(9): 2197-2206.
- 653 Kujala, T. and R. Näätänen (2010). The adaptive brain: A neurophysiological perspective. *Progress in*  
654 *Neurobiology* 91(1): 55-67.
- 655 Kullback, S., & Leibler, R. A. (1951). On information and sufficiency. *The annals of mathematical*  
656 *statistics*, 22(1), 79-86.

## BMS Maps for group studies with M/EEG data

- 657 Lappalainen, H., Miskin, J.W., 2000. Ensemble Learning, in: Girolami, M. (Ed.), *Advances in*  
658 *Independent Component Analysis*. Springer-Verlag, Berlin.
- 659 Larson, M. J. and K. A. Carbine (2017). Sample size calculations in human electrophysiology (EEG  
660 and ERP) studies: A systematic review and recommendations for increased rigor. *International*  
661 *Journal of Psychophysiology* 111: 33-41.
- 662 Lieder, F., J. Daunizeau, M. Garrido, K. Friston and K. Stephan (2013). Modelling Trial-by-Trial  
663 Changes in the Mismatch Negativity. *PLoS Computational Biology* 9(2) e1002911: 1-16.
- 664 Litvak, V., Friston, K., 2008. Electromagnetic source reconstruction for group studies, *NeuroImage*,  
665 pp. 1490-1498.
- 666 Lv, J.-Y., T. Wang, J. Qiu, S.-H. Feng, S. Tu and D.-T. Wei (2010). The electrophysiological effect of  
667 working memory load on involuntary attention in an auditory–visual distraction paradigm: an ERP  
668 study. *Experimental Brain Research* 205(1): 81-86.
- 669 Mangun, G. R. and S. A. Hillyard (1991). Modulations of Sensory-Evoked Brain Potentials Indicate  
670 Changes in Perceptual Processing During Visual–Spatial Priming. *Journal of Experimental*  
671 *Psychology: Human Perception and Performance* 17(4): 1057-1074.
- 672 Meinert, C. L. (2012). *Frequentist vs. Bayesian Analysis*. Hoboken, NJ, USA, Hoboken, NJ, USA:  
673 John Wiley & Sons, Inc.
- 674 Mohammad-Djafari, A. (2002). Bayesian inference for inverse problems. *AIP Conference*  
675 *Proceedings*, 617(1), 477-496.
- 676 Montague, P.R., Hyman, S.E., Cohen, J.D., Oct 2004. Computational roles for dopamine in  
677 behavioural control. *Nature* 431, 760–767.
- 678 Näätänen, R. and K. Alho (1997). Higher-order processes in auditory-change detection. *Trends in*  
679 *Cognitive Sciences* 1(2): 44-45.
- 680 Näätänen, R., T. Kujala and I. Winkler (2011). Auditory processing that leads to conscious perception:  
681 A unique window to central auditory processing opened by the mismatch negativity and related  
682 responses. *Psychophysiology* 48(1): 4-22.
- 683 Naeaetaenen, R., M. Tervaniemi, E. Sussman, P. Paavilainen and I. Winkler (2001). 'Primitive  
684 intelligence' in the auditory cortex. *R. Naeaetaenen*. 24: 283-288.
- 685 Neal, R. (1998). Annealed importance sampling (Technical Report 9805 (revised)). Department of  
686 Statistics, University of Toronto.
- 687 Needham, C. J., Bradford, J. R., Bulpitt, A. J., & Westhead, D. R. (2007). A primer on learning in  
688 Bayesian networks for computational biology. *PLoS computational biology*, 3(8), e129.
- 689 Neyman, J. and E. S. Pearson (1933). On the Problem of the Most Efficient Tests of Statistical  
690 Hypotheses. *Philosophical Transactions of the Royal Society of London*. Series A, Containing Papers  
691 of a Mathematical or Physical Character (1896-1934) 231(694): 289-337.
- 692 O'Doherty, J.P., Hampton, A., Kim, H., May 2007. Model-based fMRI and its application to reward  
693 learning and decision making. *Ann. N.Y. Acad. Sci.* 1104, 35–53.
- 694 Penny, W. D. (2012). Comparing dynamic causal models using AIC, BIC and free energy. *NeuroImage*,  
695 59(1), 319-330.
- 696 Penny, W. D., & Ridgway, G. R. (2013). Efficient posterior probability mapping using Savage-Dickey  
697 ratios. *PLoS One*, 8(3), e59655.

- 698 Penny, W. D., J. Mattout and N. Trujillo-Barreto (2007). CHAPTER 35 - Bayesian model selection and  
699 averaging. *Statistical Parametric Mapping*. London, Academic Press: 454-467.
- 700 Penny, W. D., Trujillo-Barreto, N., & Flandin, G. (2005). Bayesian analysis of single-subject fMRI data:  
701 SPM5 implementation. *Wellcome Trust Centre for Neuroimaging*, UCL, London.
- 702 Penny, W. D., Trujillo-Barreto, N. J., & Friston, K. J. (2005). Bayesian fMRI time series analysis with  
703 spatial priors. *NeuroImage*, 24(2), 350-362.
- 704 Penny, W., & Flandin, G. (2005). Bayesian analysis of fMRI data with spatial priors. In *Proceedings*  
705 *of the Joint Statistical Meeting (JSM)*. American Statistical Association.
- 706 Penny, W., & Sengupta, B. (2016). Annealed importance sampling for neural mass models. *PLoS*  
707 *computational biology*, 12(3), e1004797.
- 708 Penny, W., Flandin, G., & Trujillo-Barreto, N. (2007). Bayesian comparison of spatially regularised  
709 general linear models. *Human brain mapping*, 28(4), 275-293.
- 710 Penny, W., Kiebel, S., & Friston, K. (2003). variational Bayesian inference for fMRI time  
711 series. *NeuroImage*, 19(3), 727-741.
- 712 Penny, W., S. Kiebel and K. Friston (2007). CHAPTER 24 - variational Bayes. *Statistical Parametric*  
713 *Mapping*. London, Academic Press: 303-312.
- 714 Penny, W.D., Stephan, K.E., Mechelli, A., Friston, K.J., (2004). Comparing dynamic causal models.  
715 *NeuroImage* 22 (3), 1157-1172.
- 716 Rao, R., P. N. and D. H. Ballard (1999). Predictive coding in the visual cortex: a functional  
717 interpretation of some extra-classical receptive-field effects. *Nature Neuroscience* 2(1): 79-87.
- 718 Rosa, M., S. Bestmann, L. Harrison and W. Penny (2010). Bayesian Model Selection Maps for Group  
719 Studies. *NeuroImage*, 49(1), 217-224.
- 720 Rowe, E.G., Harris C.D., Randeniya, R. and Garrido, M.I. (2018). Bayesian Model Selection Maps for  
721 group studies using M/EEG data: EEG\_Auditory\_Oddball\_Preprocessed\_Data. Figshare. (2018)  
722 <https://figshare.com/s/c6e1f9120763c43e6031> doi: 10.6084/m9.figshare.5812764
- 723 Rowe, E.G., Harris C.D., Randeniya, R. and Garrido, M.I. (2018). Bayesian Model Selection Maps for  
724 group studies using M/EEG data: EEG\_Auditory\_Oddball\_Raw\_Data. Figshare. (2018) ,  
725 <https://figshare.com/s/1ef6dd4bbdd4059e3891> doi: 10.6084/m9.figshare.5769141
- 726 Sallinen, M., J. Kaartinen and H. Lyytinen (1994). Is the appearance of mismatch negativity during  
727 stage 2 sleep related to the elicitation of K-complex? *Electroencephalography and Clinical*  
728 *Neurophysiology* 91(2): 140-148.
- 729 Shannon, C. E. (2001 [originally 1948]). A mathematical theory of communication. *ACM SIGMOBILE*  
730 *Mobile Computing and Communications Review*, 5(1), 3-55.
- 731 Stephan, K. E., W. D. Penny, J. Daunizeau, R. J. Moran and K. J. Friston (2009). Bayesian model  
732 selection for group studies. *NeuroImage* 46(4): 1004-1017.
- 733 Summerfield, C. and T. Egner (2009). Expectation (and attention) in visual cognition. *Trends in*  
734 *Cognitive Sciences* 13(9): 403-409.
- 735 Summerfield, J. J., J. Lepsien, D. R. Gitelman, M. M. Mesulam and A. C. Nobre (2006). Orienting  
736 Attention Based on Long-Term Memory Experience. *Neuron* 49(6): 905-916.
- 737 Szucs, D., J. P. A. Ioannidis and E.-J. Wagenmakers (2017). Empirical assessment of published effect  
738 sizes and power in the recent cognitive neuroscience and psychology literature. *PLoS Biology* 15(3):  
739 1-18.

## BMS Maps for group studies with M/EEG data

- 740 Trippa, L., Lee, E. Q., Wen, P. Y., Batchelor, T. T., Cloughesy, T., Parmigiani, G., & Alexander, B. M.  
741 (2012). Bayesian adaptive randomized trial design for patients with recurrent glioblastoma. *Journal*  
742 *of Clinical Oncology*, 30(26), 3258-3263.
- 743 Vallverdú, J. (2008). The false dilemma: Bayesian vs. frequentist. *arXiv preprint* arXiv:0804.0486.
- 744 Woolrich M, Jenkinson M, Brady M, Smith S (2004) Fully Bayesian spatio-temporal modeling of fMRI  
745 data. *IEEE Trans Med Imaging* 23: 213–231.
- 746 Woolrich, M.W., Behrens, T.E., Beckmann, C.F., Smith, S.M., Jan 2005. Mixture models with adaptive  
747 spatial regularization for segmentation with an application to fMRI data. *IEEE Trans. Med. Imaging*  
748 24, 1–11.
- 749 Yucel, G., C. Petty, G. McCarthy and A. Belger (2005). Graded Visual Attention Modulates Brain  
750 Responses Evoked by Task-irrelevant Auditory Pitch Changes. *Journal of Cognitive Neuroscience*  
751 17(12): 1819-1828.

## 752 11 Supplementary Material

753 Please see the Supplementary Material attached.

754 **12 Figures**

755 **Figure 1**

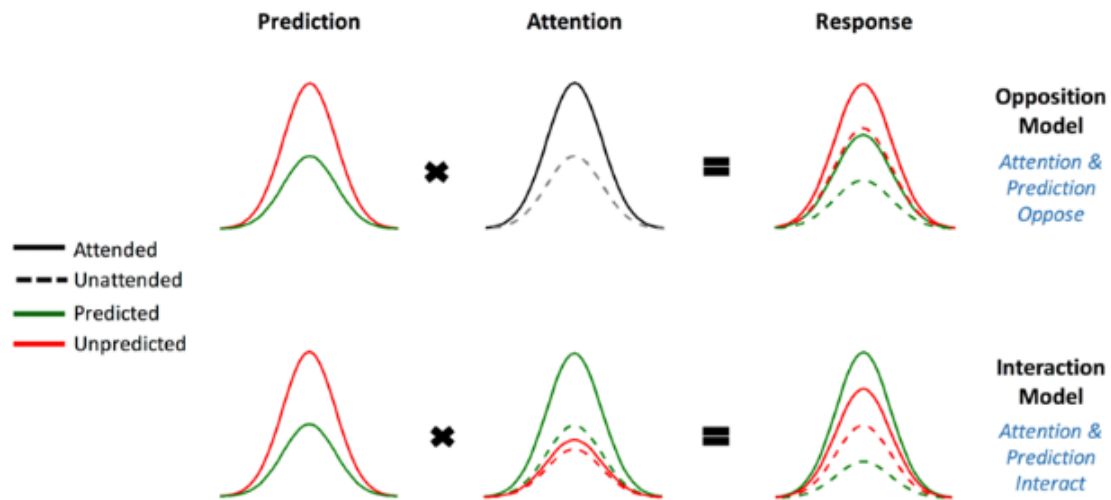

756

757

758 **Figure 1:** The two competing models that were evaluated using BMS. Reprinted with permission from  
759 Garrido et al. (2017) DOI: 10.1093/cercor/bhx087. Figure Published by Oxford University Press. All  
760 rights reserved. Available online at: [https://academic.oup.com/cercor/advance-](https://academic.oup.com/cercor/advance-article/doi/10.1093/cercor/bhx087/3571164?searchresult=1)  
761 [article/doi/10.1093/cercor/bhx087/3571164?searchresult=1](https://academic.oup.com/cercor/advance-article/doi/10.1093/cercor/bhx087/3571164?searchresult=1). This figure is not covered by the Open-  
762 Access licence of this publication. For permissions contact [Journals.permissions@OUP.com](mailto:Journals.permissions@OUP.com)

763

## BMS Maps for group studies with M/EEG data

764 **Figure 2**

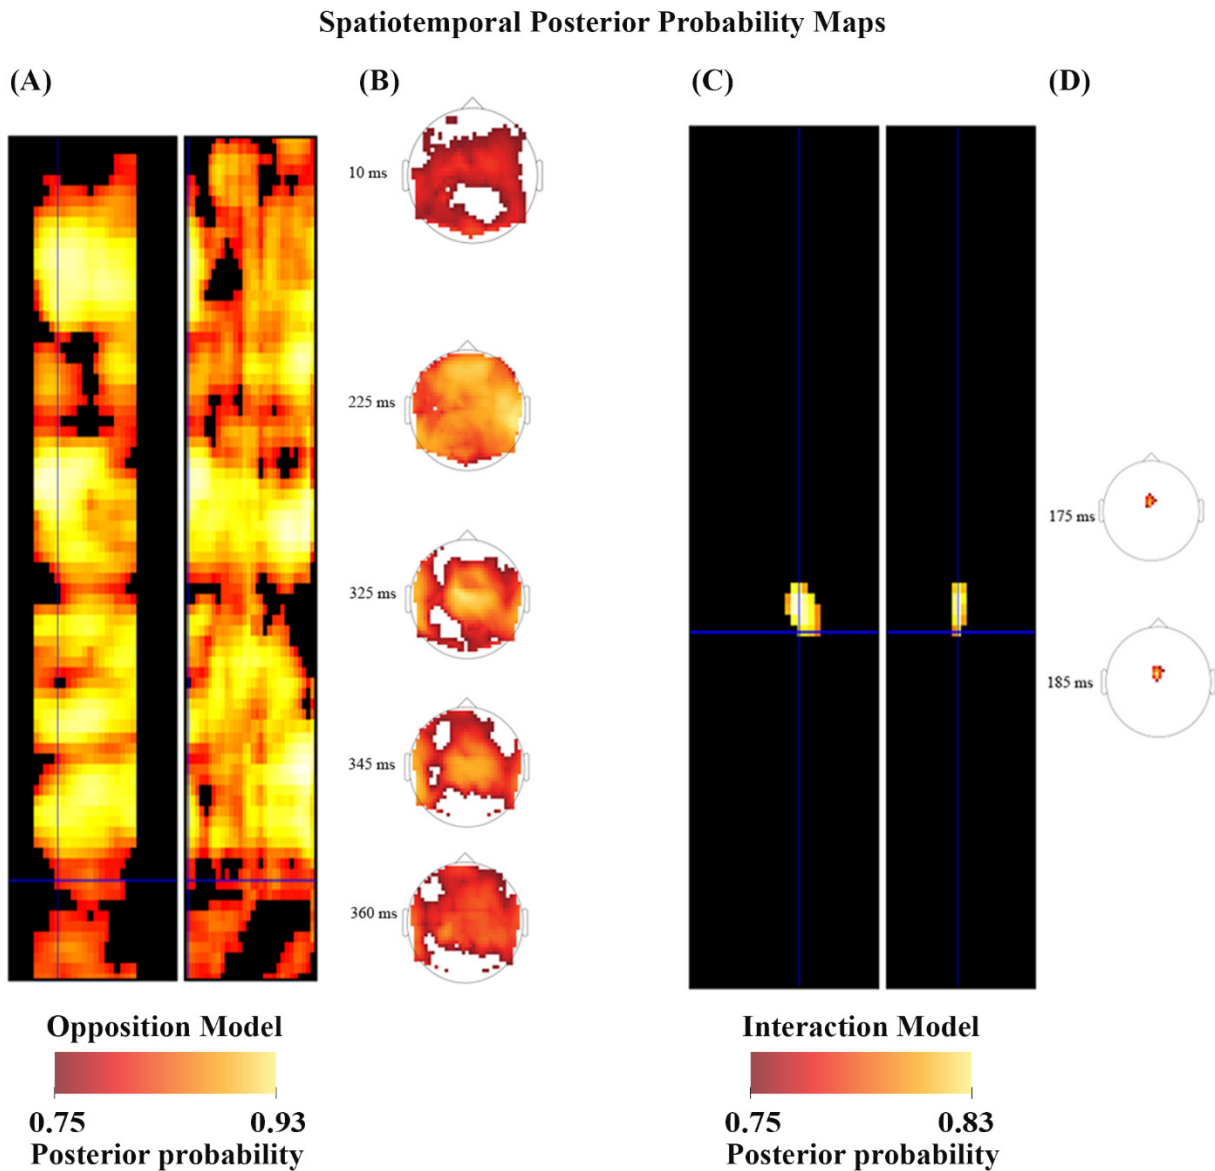

765

766 [Panels from left to right: A, B, C and D]

767 **Figure 2:** Scalp Posterior Probability Maps of the two competing models over space and time. (The  
768 scalp images include the participant's nose, pointing upwards, and ears, visible as if viewed from  
769 above.) These maps display all posterior probabilities exceeding 75% over space and time for both  
770 models. The left sides of both panels (A) and (C) both depict the temporal information, showing the  
771 model probabilities at each point in time from 0 ms (when the tone was played, at the top of the  
772 diagrams) to 400 ms after the stimulus presentation (at the bottom of the diagram), across the surface  
773 of the scalp (which traverses the width of the panels). The right sides (B) and (D) show the spatial  
774 locations of the probability clusters which exceeded the threshold of 75% probability.

775 **Figure 3**

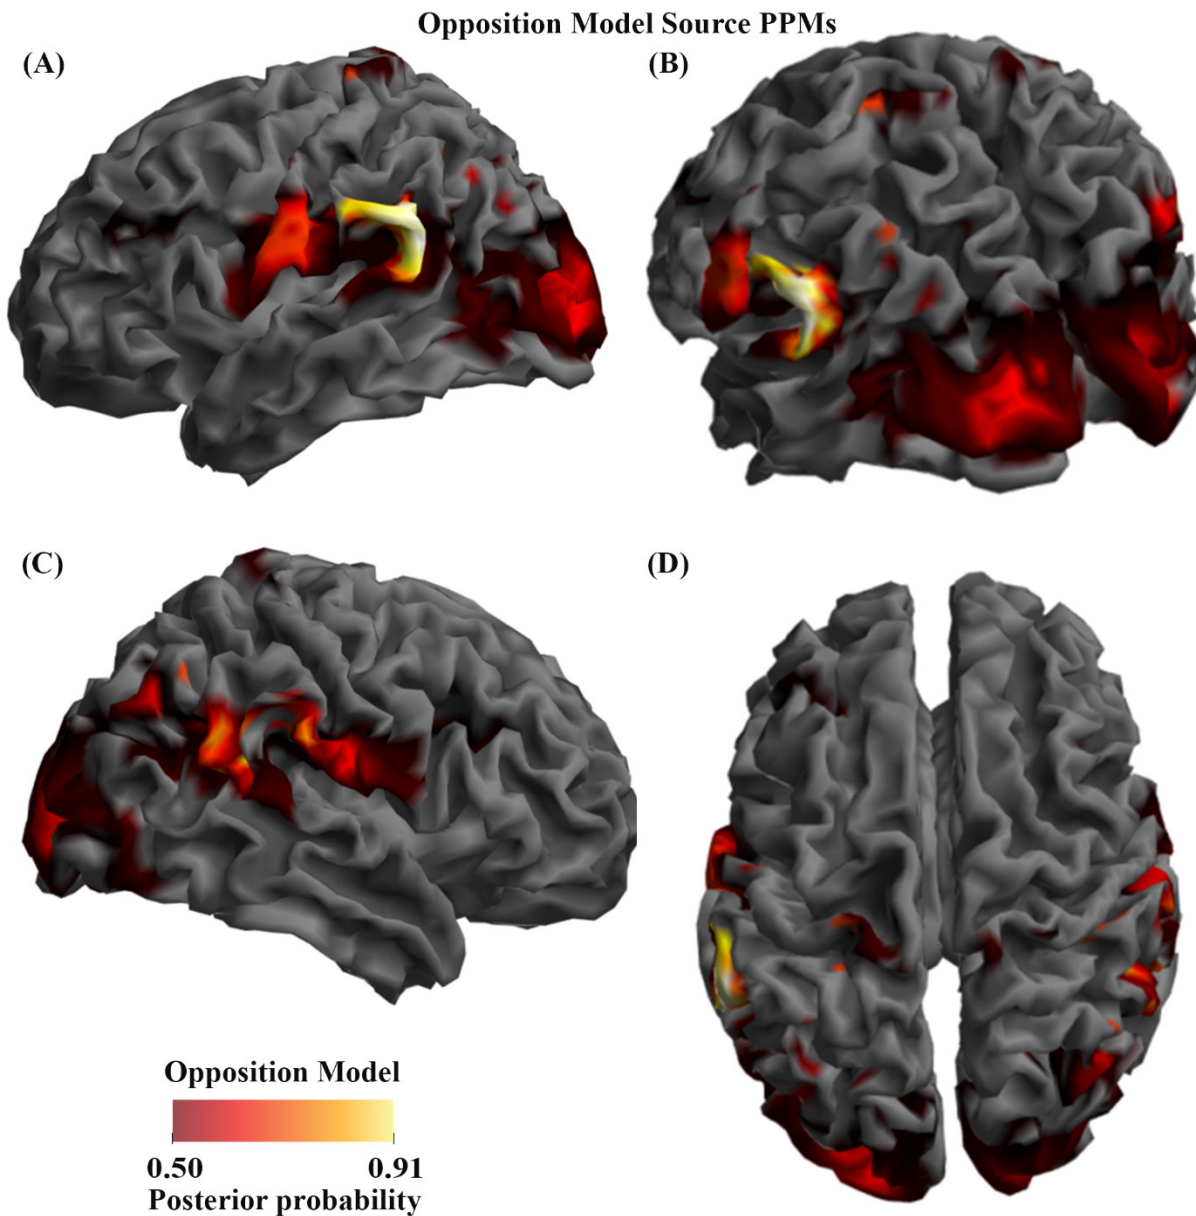

776

777 [Panels from left to right and then top to bottom: A, B, C and D]

778 **Figure 3:** Source Posterior Probability Map for the Opposition Model (that is, reconstructed images  
779 representing the model inference at the group level for this model), thresholded at >50% posterior  
780 probability. (A): view from the left side. (B): view from the left side, from the posterior (back) end.  
781 (C): view from the right side. (D): view from above.

782



## BMS Maps for group studies with M/EEG data

783 **Figure 4**

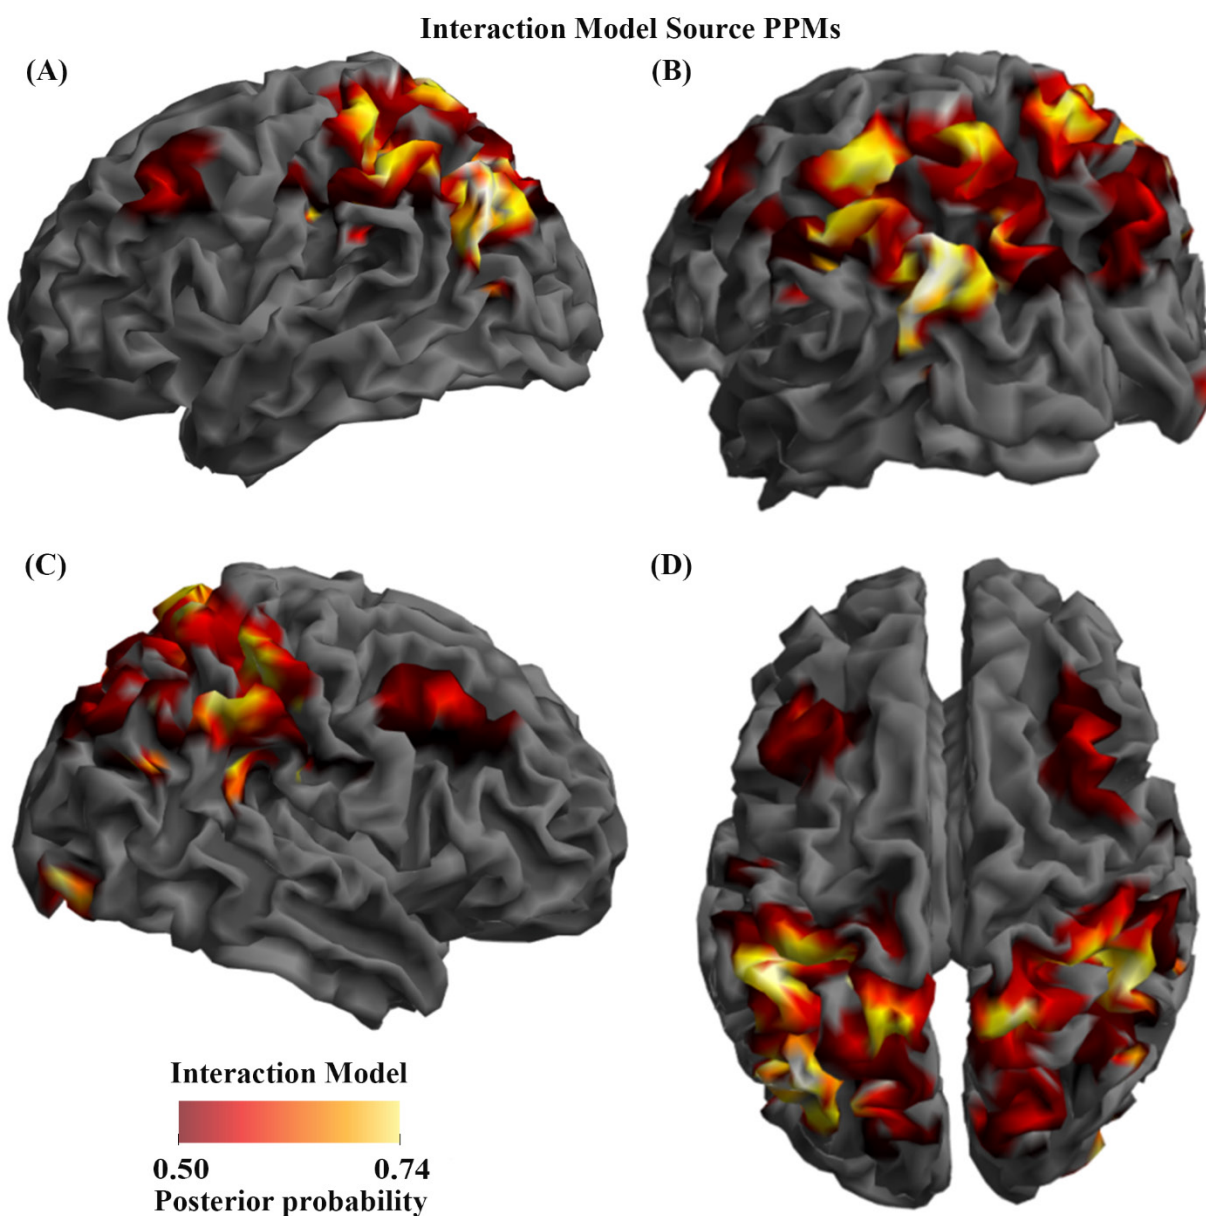

784

785 [Panels from left to right and then top to bottom: A, B, C and D]

786 **Figure 4:** Source Posterior Probability Map for the Interaction Model (that is, reconstructed images  
787 representing the model inference at the group level for this model), thresholded at >50% posterior  
788 probability. (A): view from the left side. (B): view from the left side, from the posterior (back) end.  
789 (C): view from the right side. (D): view from above.

790

791 **Figure 5**

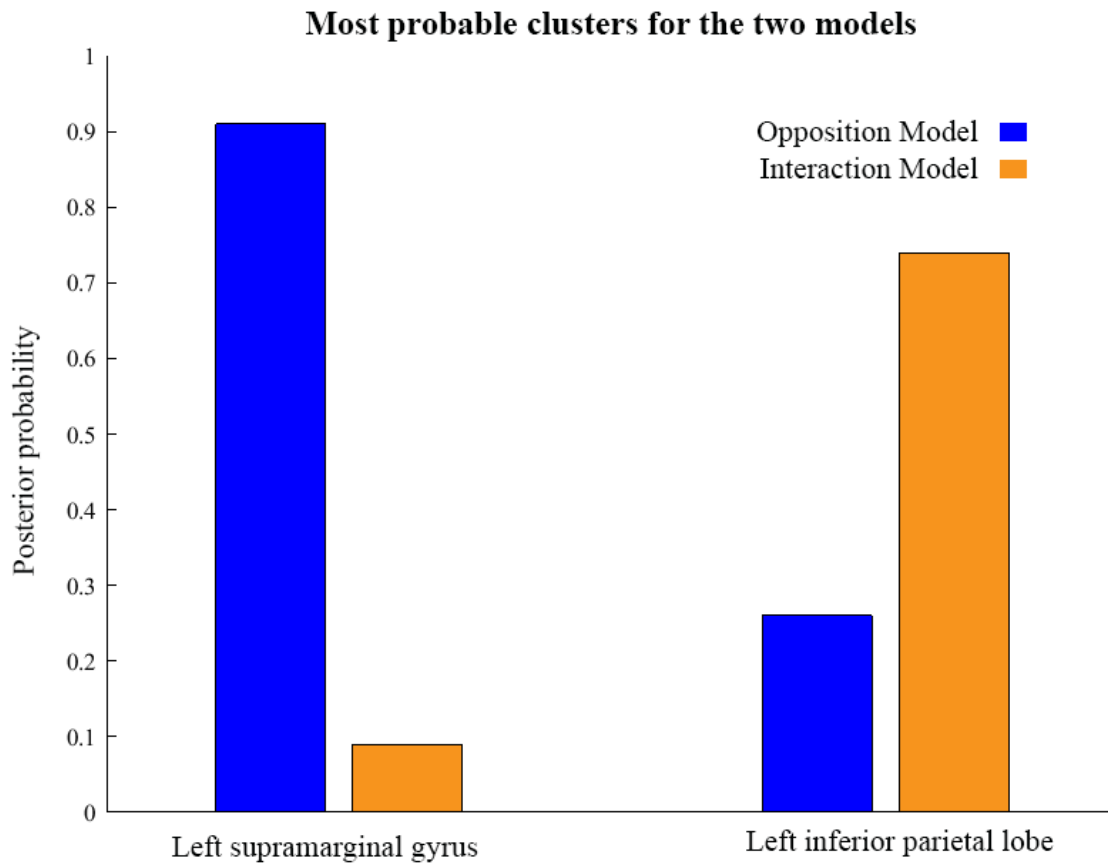

792

793 **Figure 5:** Comparison of the posterior probabilities for the two models at the location of the highest-  
794 probability cluster of the Opposition Model (left) and the location of the highest-probability cluster of  
795 the Interaction Model (right). The left supramarginal gyrus cluster, which was the highest probability  
796 cluster for the Opposition Model (left), was located at Montreal Neurological Institute (MNI)  
797 coordinates (62, -42, 30), while the left inferior parietal lobe cluster, which was the highest probability  
798 cluster for the Interaction Model, was located at MNI coordinates (-54, -32, 46).

## BMS Maps for group studies with M/EEG data

### 799 13 Table

| <b>Table 1: Step-by-step summary of method</b> |                                                                                                                                                                                                                                                                                                                                                                                                                                                                                                                                                                                                                                                                                                                                                                                                                          |
|------------------------------------------------|--------------------------------------------------------------------------------------------------------------------------------------------------------------------------------------------------------------------------------------------------------------------------------------------------------------------------------------------------------------------------------------------------------------------------------------------------------------------------------------------------------------------------------------------------------------------------------------------------------------------------------------------------------------------------------------------------------------------------------------------------------------------------------------------------------------------------|
| <b>Task:</b>                                   | <b>Suggested steps:</b>                                                                                                                                                                                                                                                                                                                                                                                                                                                                                                                                                                                                                                                                                                                                                                                                  |
| Saving the correct spm_spm_vb.m files          | <ol style="list-style-type: none"> <li>1. Find and open the spm12 folder on your computer.</li> <li>2. Find the spm_spm_vb.m script in that folder, and rename this to spm_spm_vb_fmRI.m. Then add the spm_spm_vb_ST.m and spm_spm_vb_source.m scripts (saved in the associated Github repository) to your spm12 folder.</li> <li>3. Before undertaking either the spatiotemporal BMS or source BMS steps, rename the currently-relevant script from the above step to spm_spm_vb.m. Once you have finished the BMS steps, rename the script back to its original name, to re-identify it as being for either the spatiotemporal ('spm_spm_vb_ST.m') or source BMS ('spm_spm_vb_source.m'). In this way, you will keep track of which spm_spm_vb.m script to use for whichever BMS steps you are about to do.</li> </ol> |
| Creating spatiotemporal ("scalp") PPMs:        | <ol style="list-style-type: none"> <li>1. BMS script 1: Change the file paths to reflect the location of ERP data.</li> <li>2. Run BMS script 1: BMS1_ST_ImCreate.m.</li> <li>3. Ensure the correct spm_spm_vb.m file is saved in SPM12 folder.</li> <li>4. Run BMS script 2: BMS2_ModelSpec_VB.m.</li> <li>5. Run BMS script 3: BMS3_PPMs.m. Threshold is set to 0.75 and adjustable.</li> </ol>                                                                                                                                                                                                                                                                                                                                                                                                                        |
| Creating source PPMs:                          | <ol style="list-style-type: none"> <li>1. BMS script 1: Change the file paths to reflect location of source reconstructed images.</li> <li>2. Run BMS script 1: BMS1_Source_ImCreate.m.</li> <li>3. Ensure the correct spm_spm_vb.m file is saved in SPM12 folder.</li> <li>4. Run BMS script 2: BMS2_ModelSpec_VB.m.</li> <li>5. Replace NaNs with zeros in the LogEv.nii files: BMS2b_Source_NaNtoZeros.m.</li> <li>6. Run BMS script 3: BMS3_PPMs.m. Adjust probability threshold as desired.</li> </ol>                                                                                                                                                                                                                                                                                                              |

Prediction

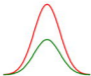

Attention

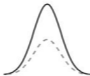

$\otimes$

$=$

Response

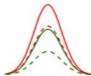

**Opposition  
Model**

*Attention &  
Prediction  
Oppose*

— Attended  
- - - Unattended  
— Predicted  
— Unpredicted

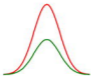

$\otimes$

$=$

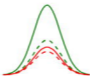

**Interaction  
Model**

*Attention &  
Prediction  
Interact*

## Spatiotemporal Posterior Probability Maps

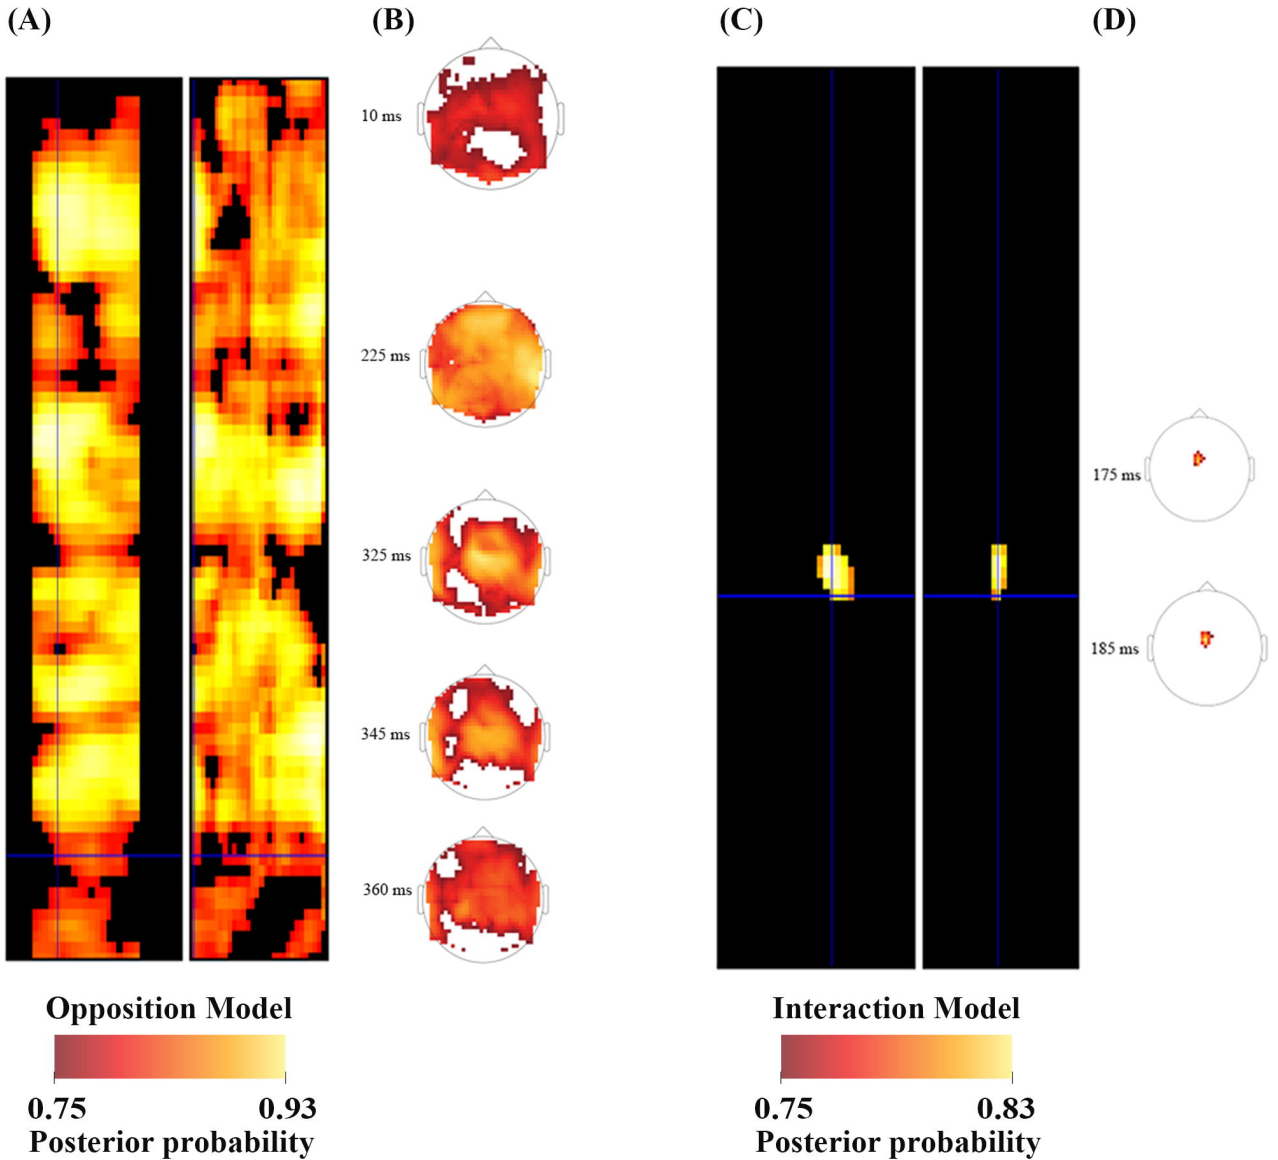

# Opposition Model Source PPMs

(A)

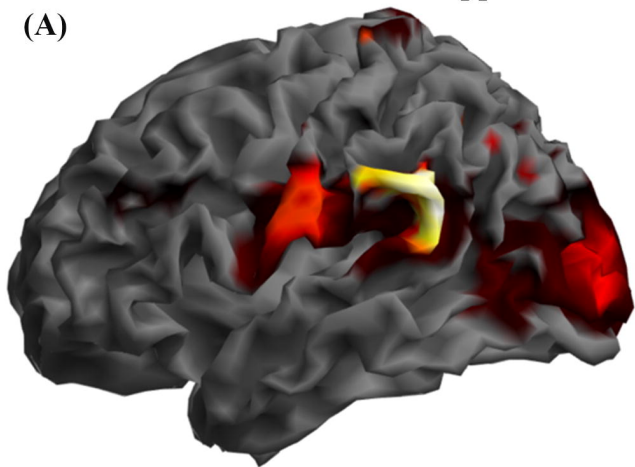

(B)

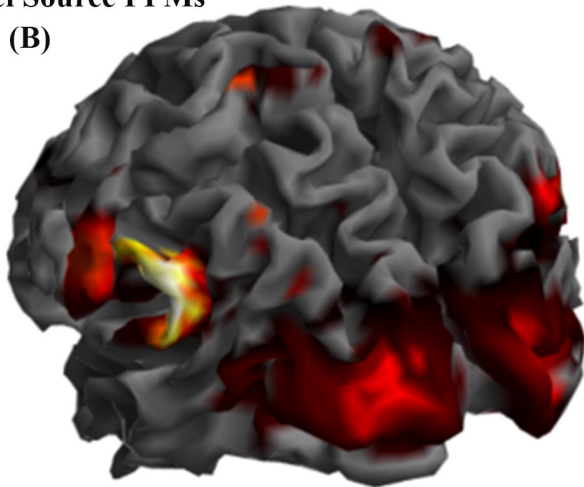

(C)

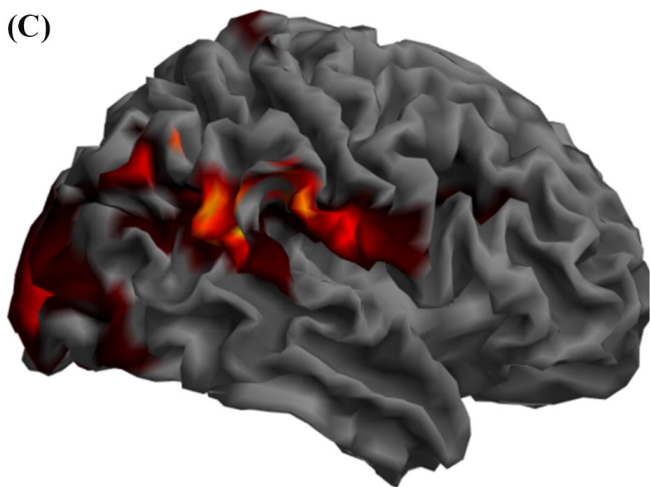

(D)

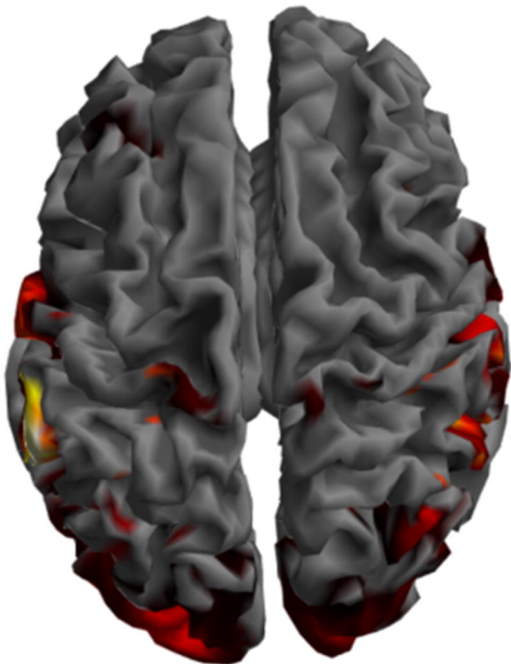

Opposition Model

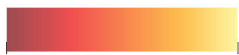

0.50

0.91

Posterior probability

# Interaction Model Source PPMs

(A)

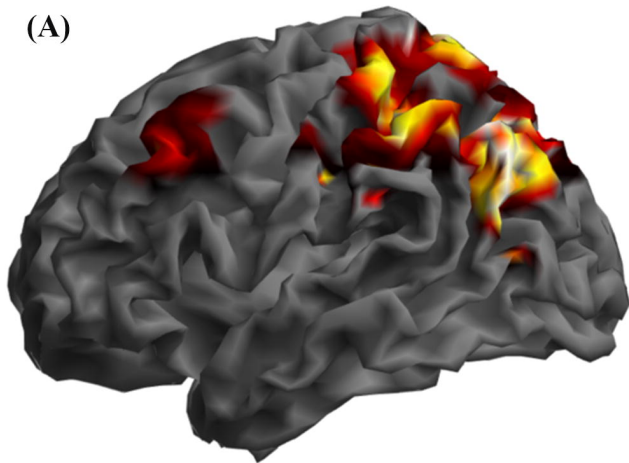

(B)

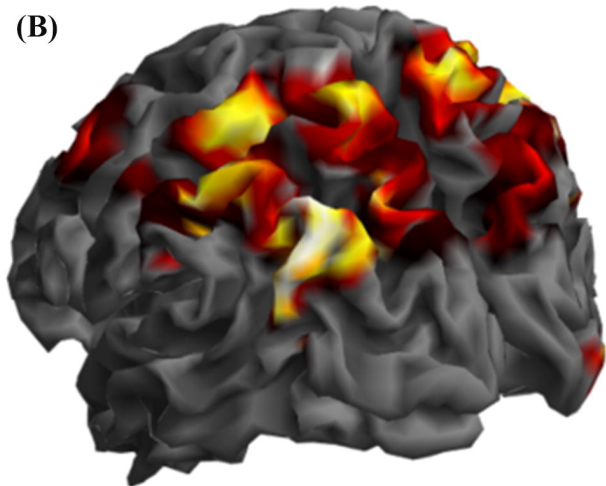

(C)

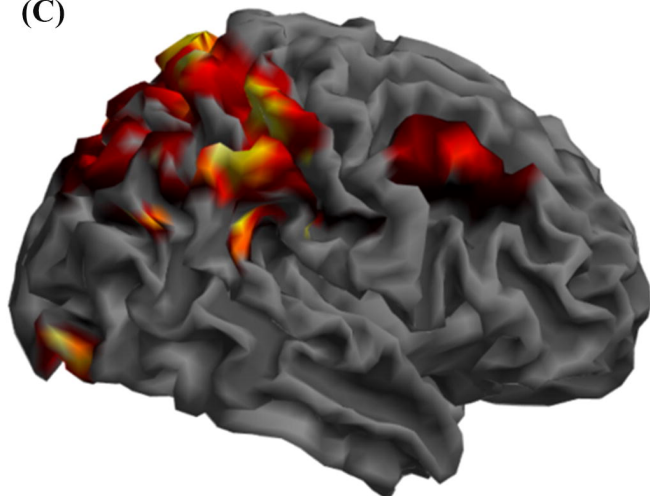

(D)

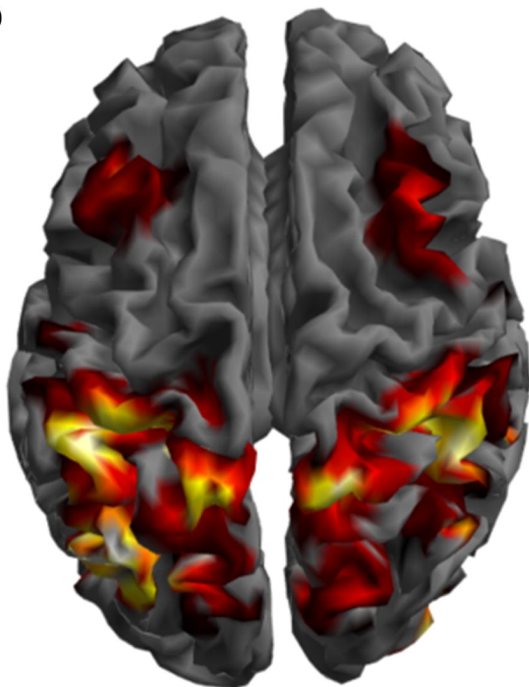

Interaction Model

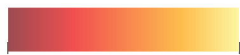

0.50

0.74

Posterior probability

## Most probable clusters for the two models

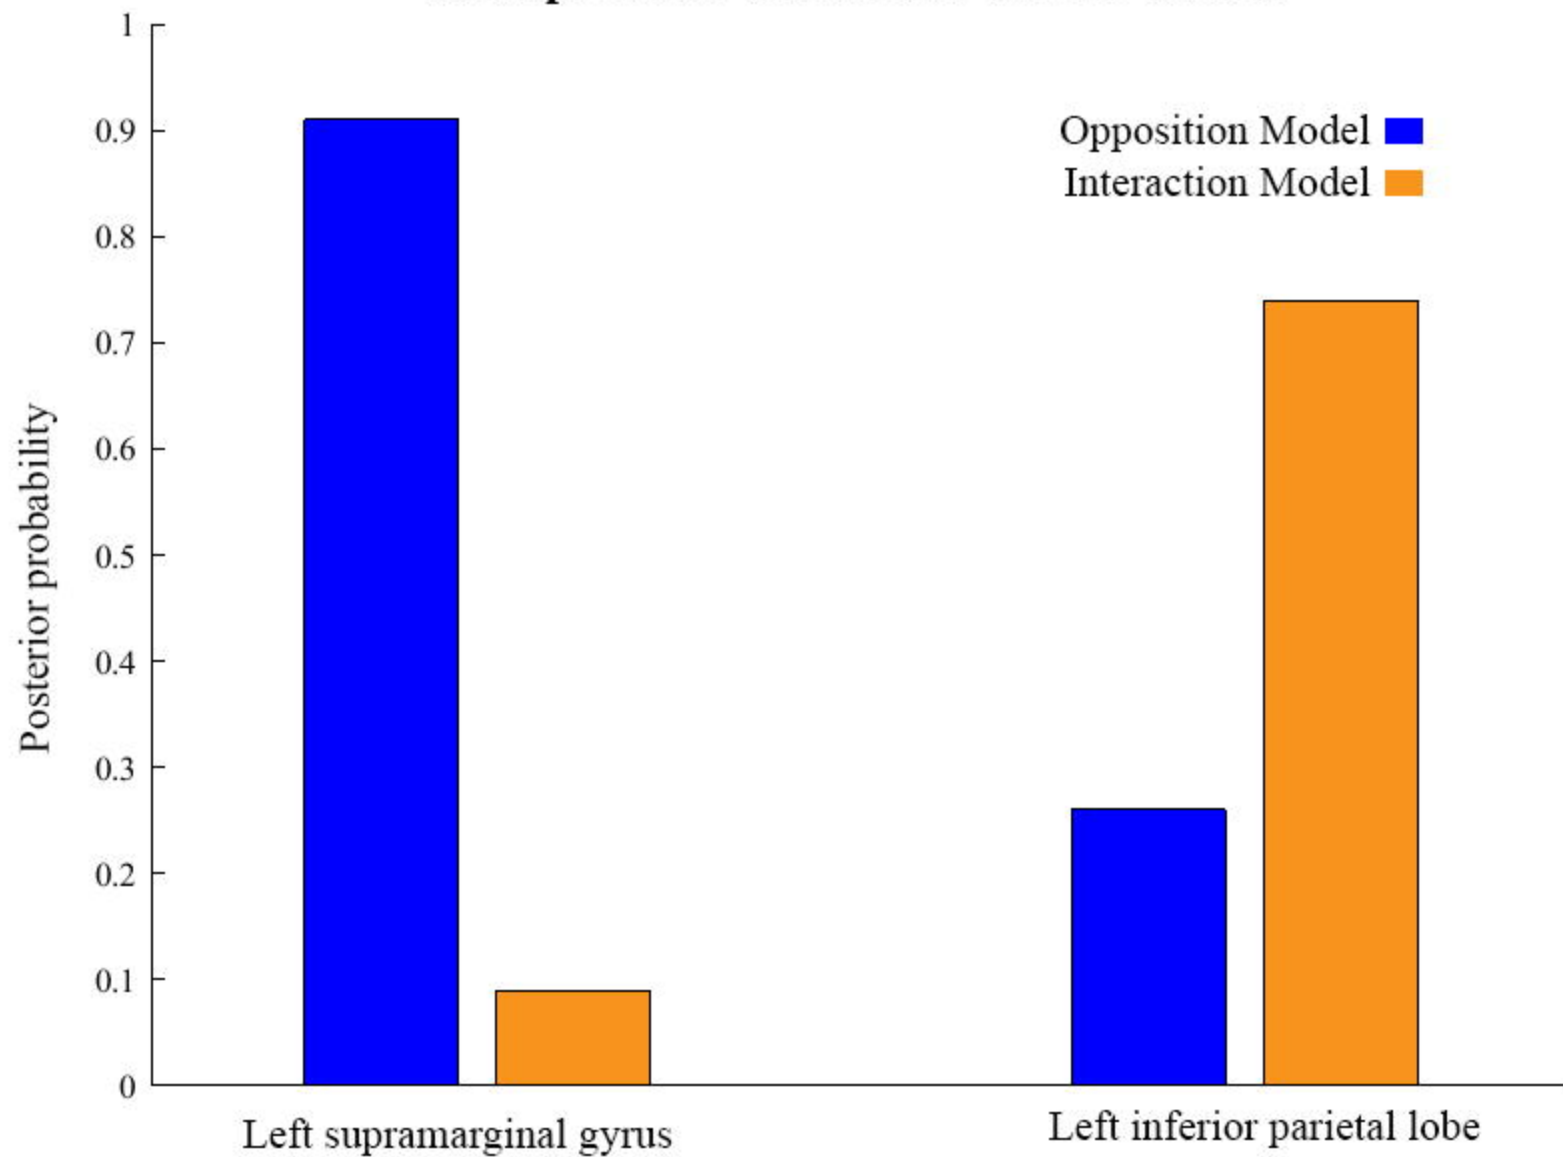

Source: https://www.biorxiv.org/content/10.1101/365056v2.full.pdf
